# Supplementary material
Source: publisher figshare collection journal article supplement (https://tandf.figshare.com/articles/dataset/_/1598112)
Supplement: Supplementary file 1 [file 2433936]

# **Probabilistic environmental risk assessment of five nanomaterials (nano-TiO<sub>2</sub>, nano-Ag, nano-ZnO, CNT, and Fullerenes)**

Claudia Coll<sup>1</sup>, Dominic Notter<sup>1</sup>, Fadri Gottschalk<sup>2</sup>, Tianyin Sun<sup>1</sup>, Claudia Som<sup>1</sup>, Bernd Nowack<sup>1\*</sup>

1) EMPA - Swiss Federal Laboratories for Material Science and Technology, Technology and Society Laboratory, Lerchenfeldstrasse 5, CH-9014 St. Gallen, Switzerland.

2) ETSS – Environmental, technical and scientific services, Chaflur 136B, CH- 7558 Strada, Switzerland

*\*Corresponding author:*

*E-mail address: [nowack@empa.ch](mailto:nowack@empa.ch)*

*Tel.: +41 (0)58 765 76 92*

## **Supporting Information**

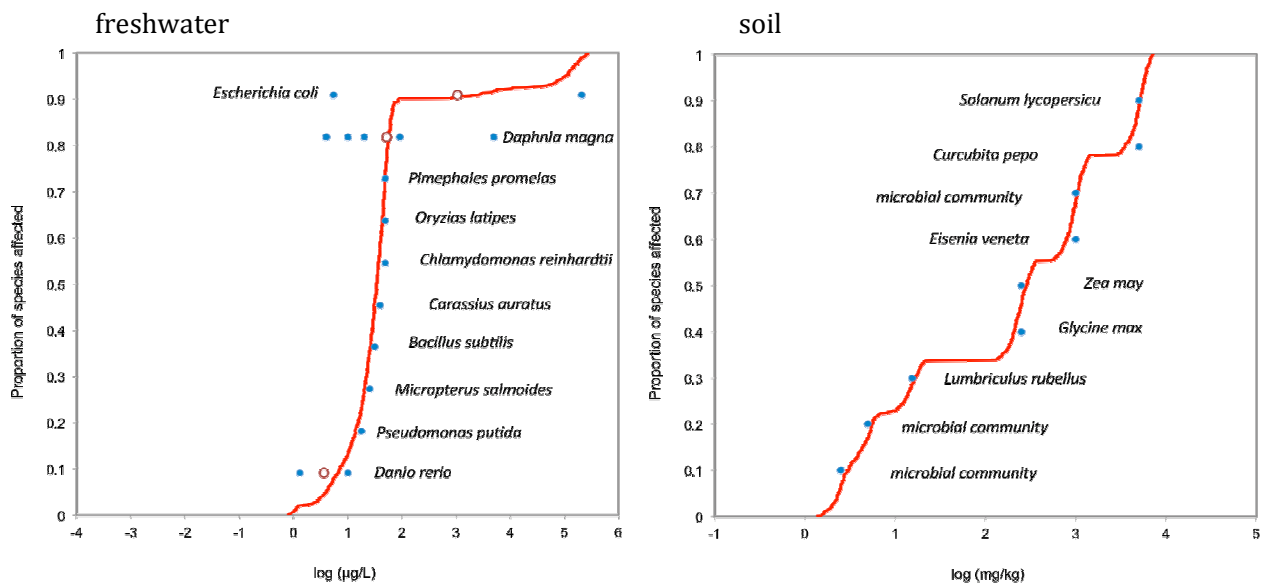

Figure S1: Probabilistic Species Sensitivity Distributions (PSSD) for fullerenes in the freshwater and soil compartments.

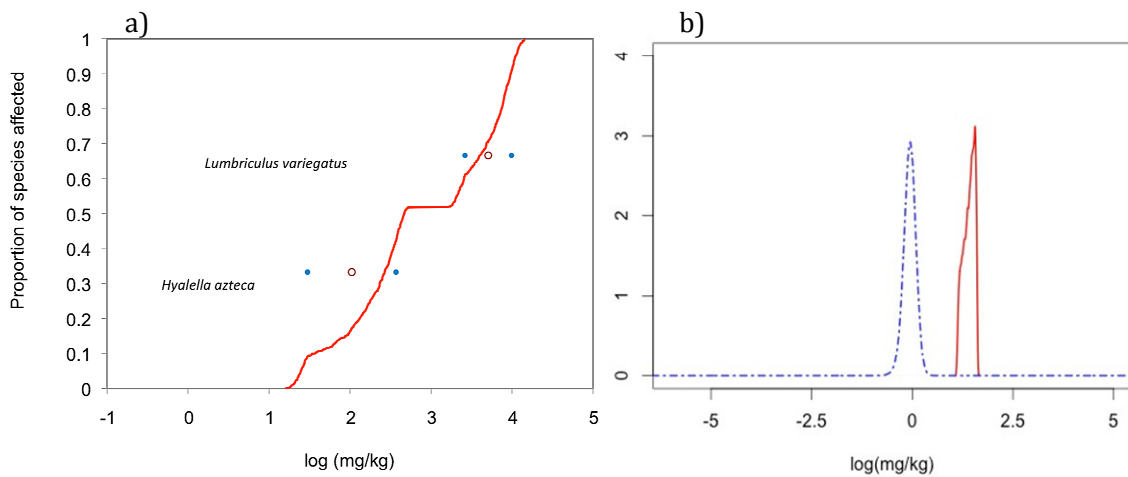

Figure S2: a) Probabilistic Species Sensitivity Distributions (PSSD) for CNTs in the sediment compartment. b) Comparison of predicted environmental concentrations (PEC) in blue and probabilistic species sensitivity distributions (pSSD) in red.

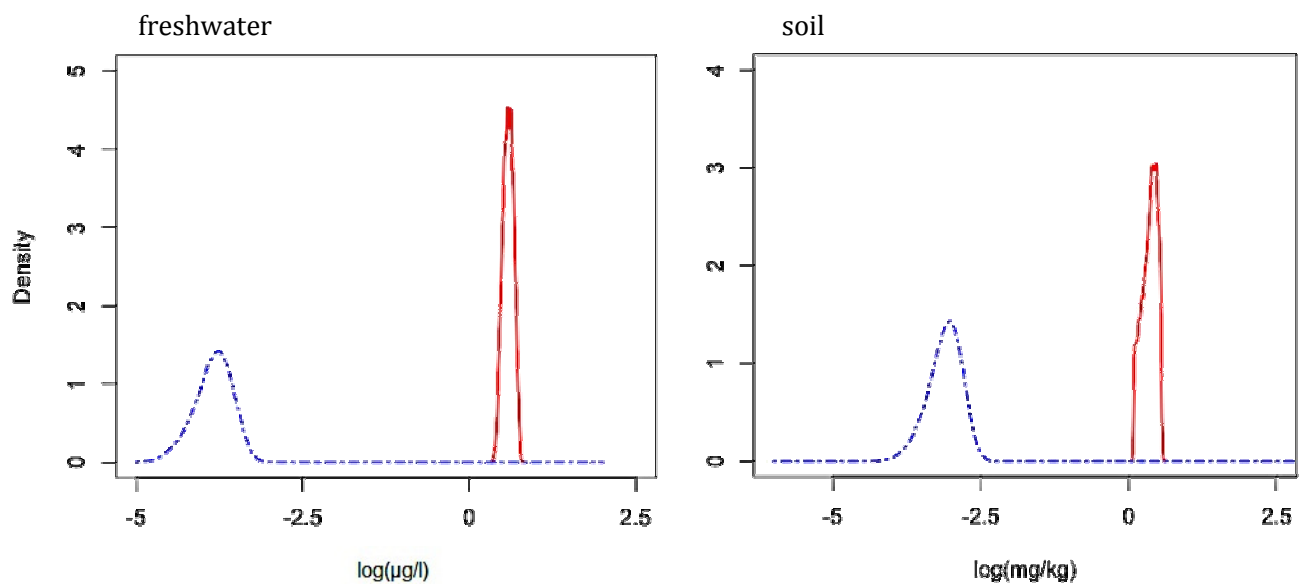

Figure S3: Comparison of predicted environmental concentration (PEC) in blue and probabilistic species sensitivity distribution (pSSD) in red for freshwater and sludge treated soils for fullerenes.

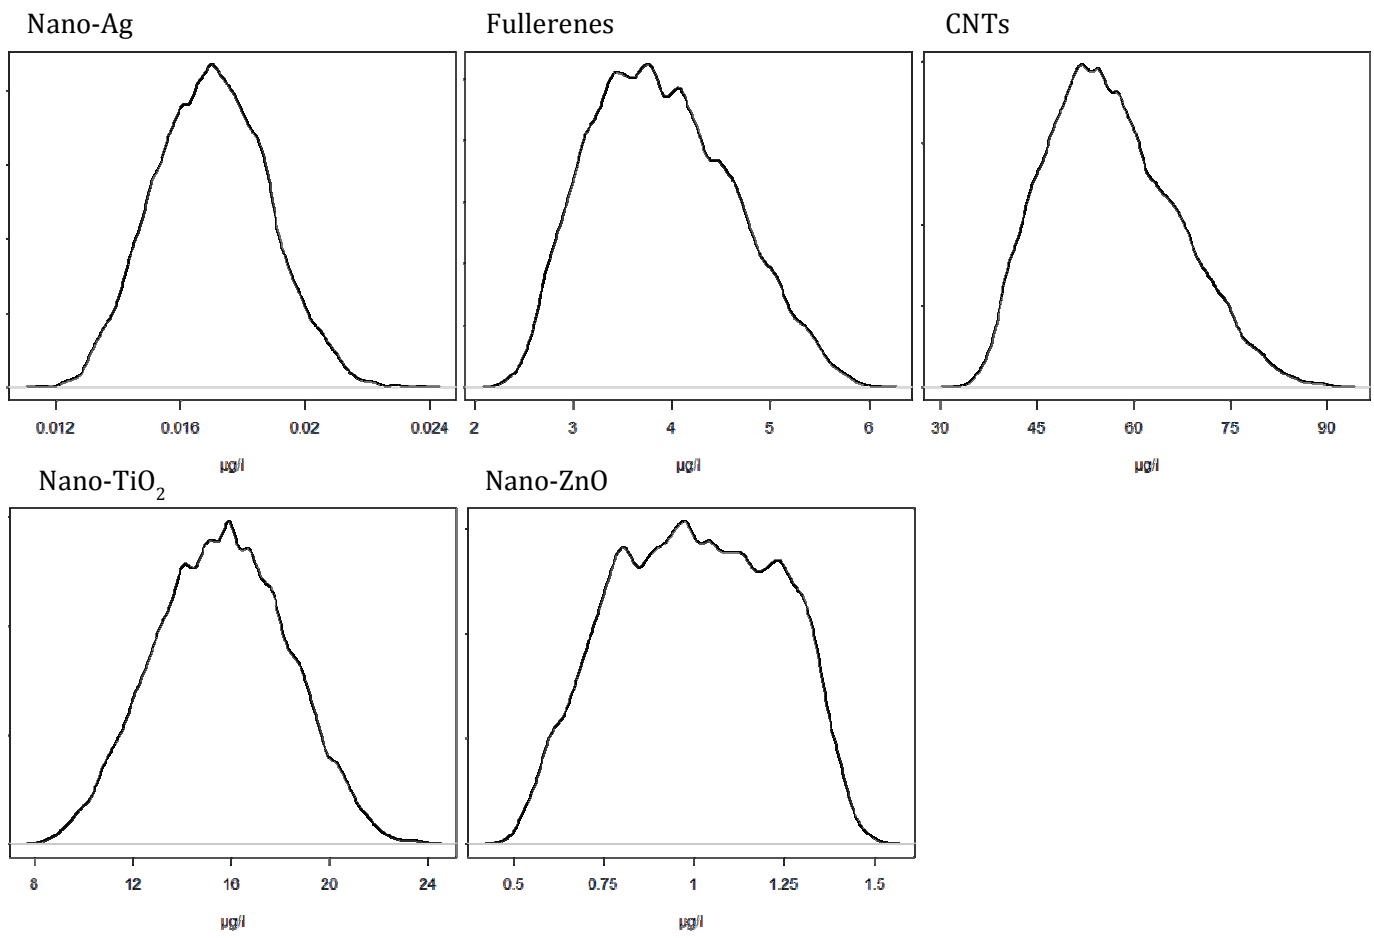

Figure S4: Predicted no-effect concentration distributions for TiO<sub>2</sub>, Ag, ZnO, fullerenes and CNT in freshwater.

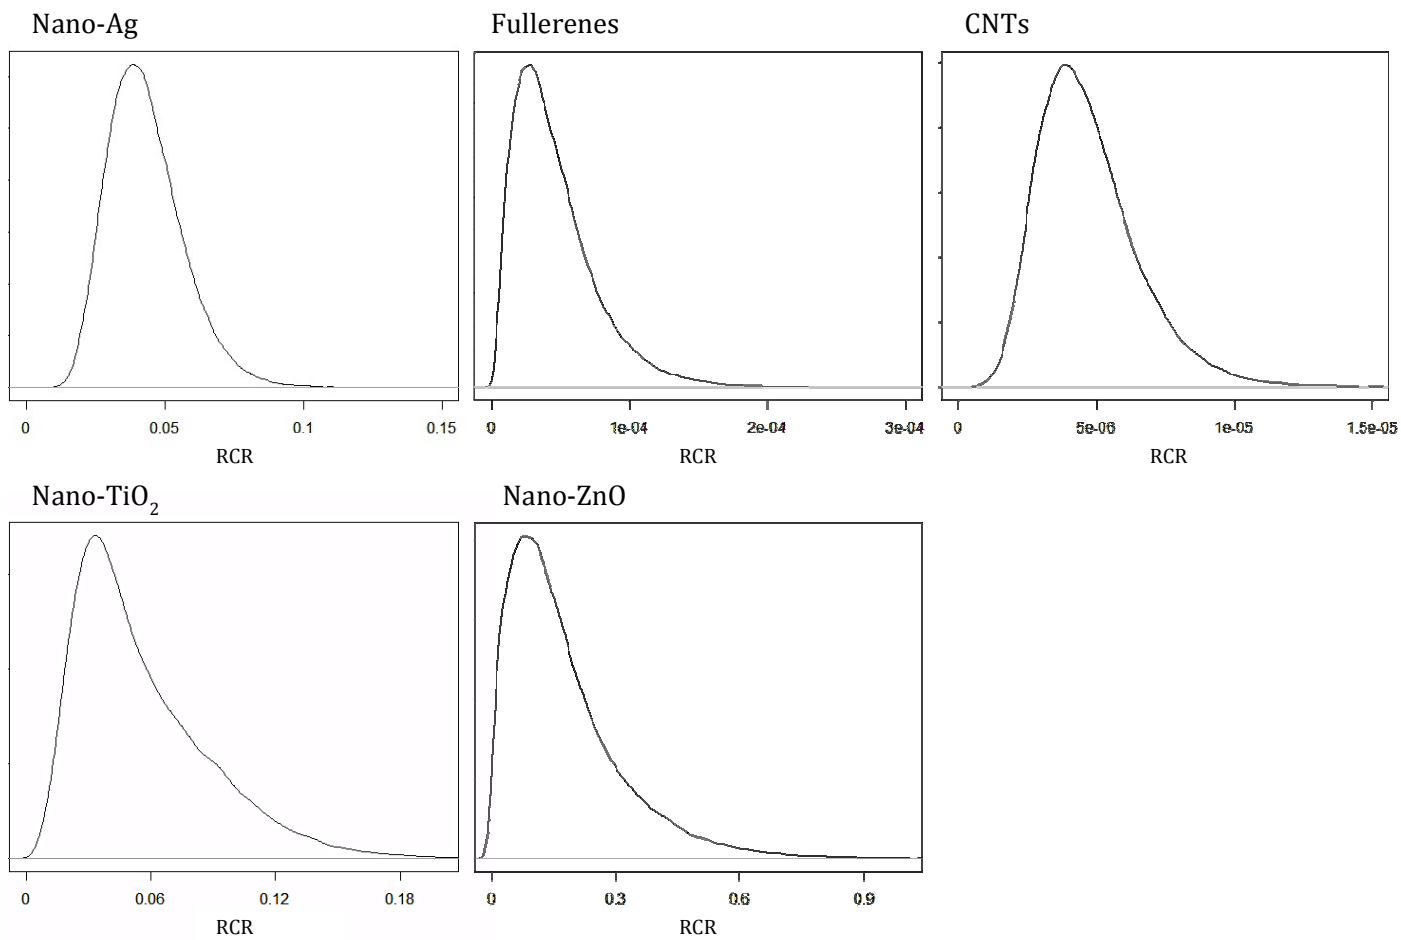

Figure S5: Risk Characterization Factor distributions for TiO<sub>2</sub>, Ag, ZnO, fullerenes and CNT in freshwater.

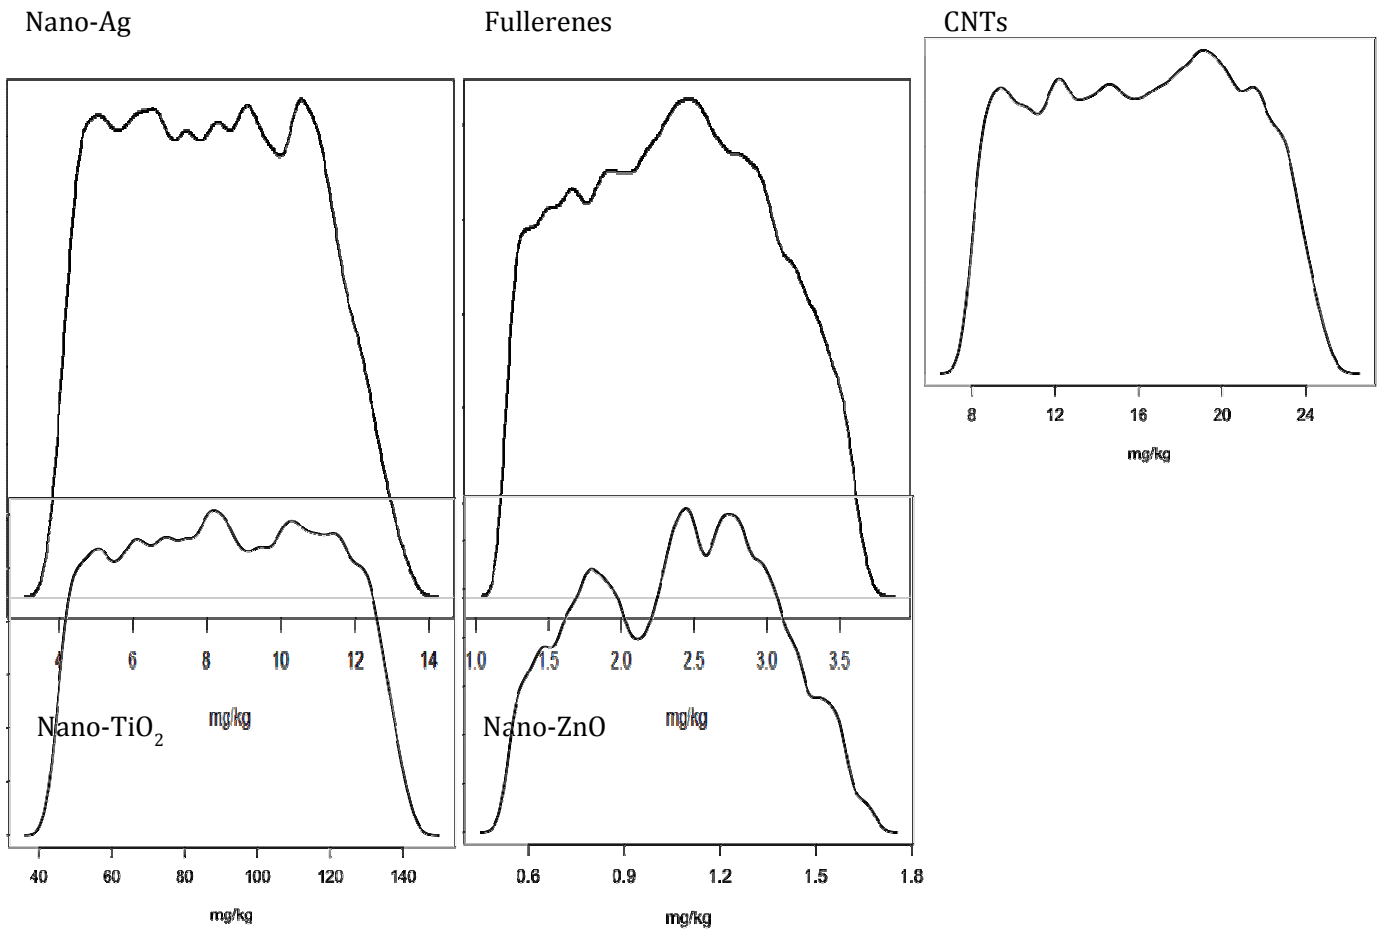

Figure S6: Predicted no-effect concentration distribution for TiO<sub>2</sub>, Ag, ZnO, fullerenes and CNT in soil.

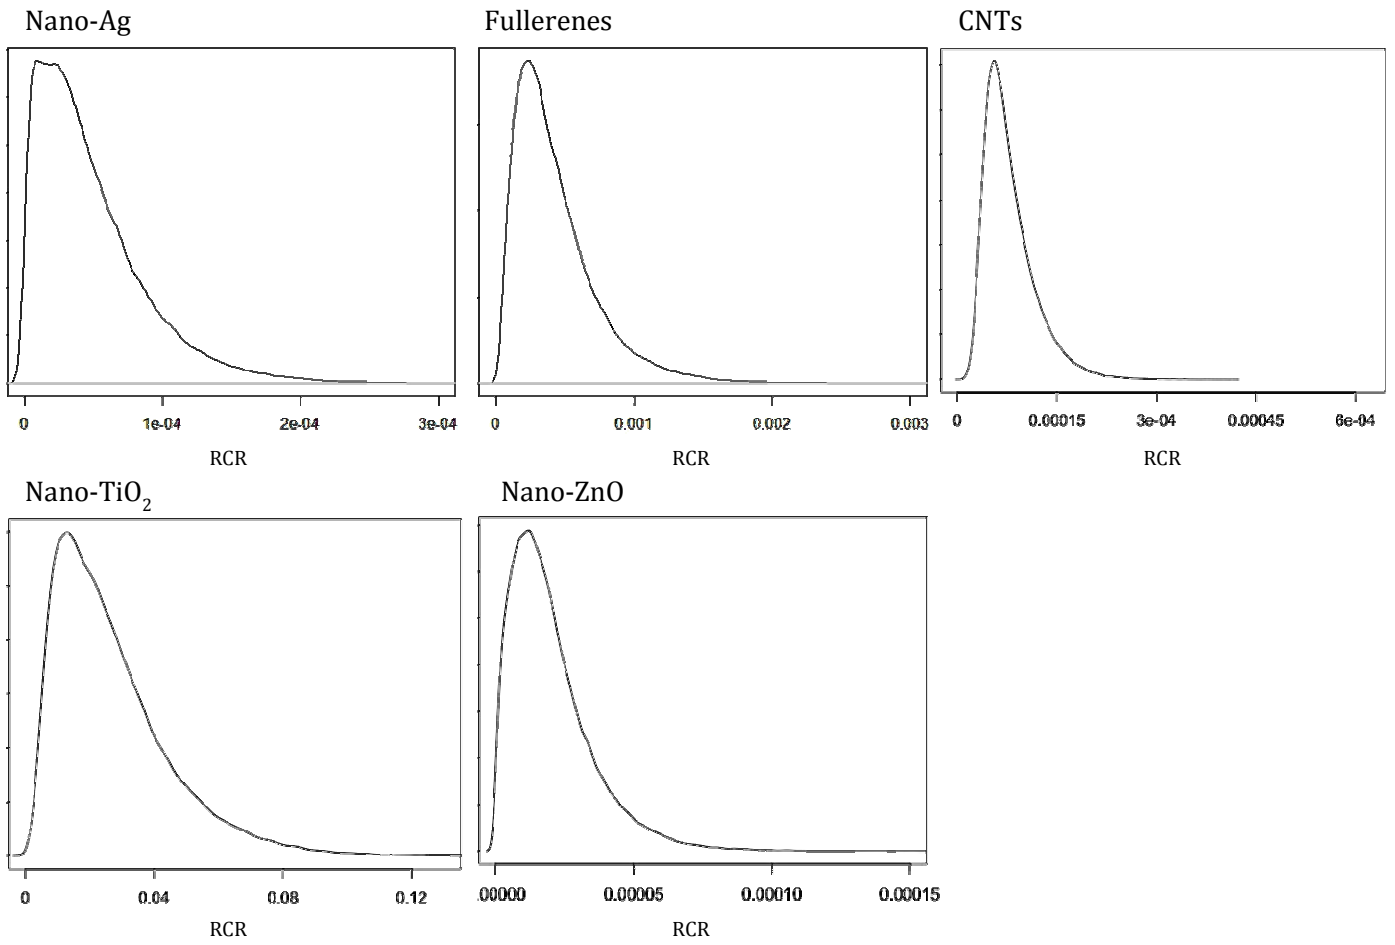

Figure S7: Risk Characterization Factor distributions for TiO<sub>2</sub>, Ag, ZnO, fullerenes and CNT in soil.

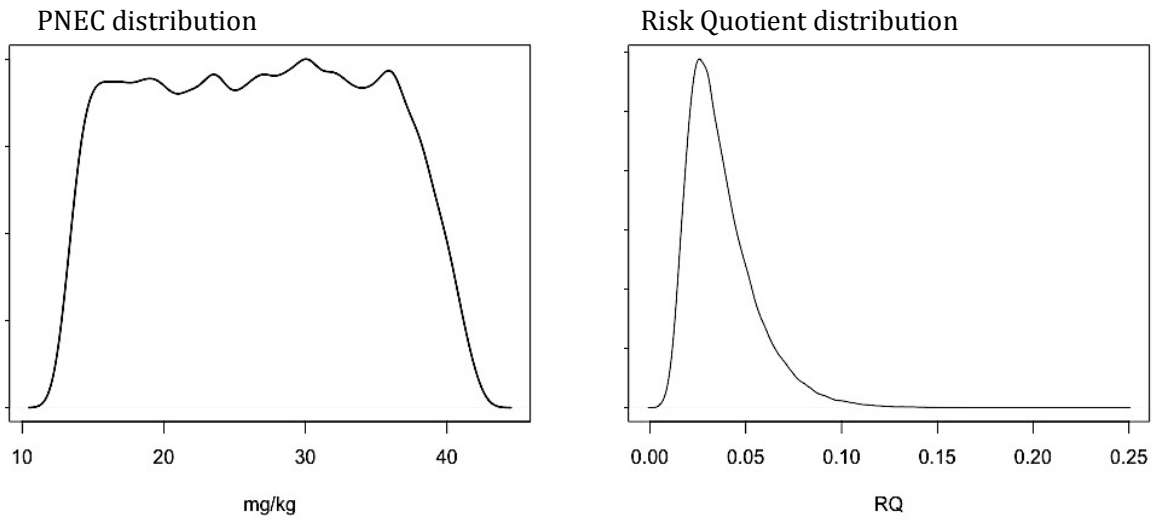

Figure S8: Predicted no-effect concentration distribution and risk quotient distribution for CNTs in sediment.



Table S1: Data for aquatic toxicity for nano-Ag, nano-TiO<sub>2</sub>, nano-ZnO, CNT and Fullerenes.

| Author                | ENM | Dose descriptor | Test organism                        | Concentration (µg/l) | Exposure time (h) | AF time | AF no-effect | Species sensitivity (µg/l) |
|-----------------------|-----|-----------------|--------------------------------------|----------------------|-------------------|---------|--------------|----------------------------|
| Mouchet, et.al. [1]   | CNT | HONEC           | <i>Ambystoma mexicanum</i>           | 100,000.00           | 288               | 10      | 1            | 10,000.00                  |
| Templeton et al. [2]  | CNT | NOEC            | <i>Amphiascus tenuiremis</i>         | 1,600.00             | 720               | 1       | 1            | 1,600.00                   |
| Li et al. [3]         | CNT | LC50            | <i>Ceriodaphnia dubia, crustacea</i> | 8,000.00             | 24                | 10      | 10           | 80.00                      |
| Alloy, et.al. [4]     | CNT | LOEC            | <i>Ceriodaphnia dubia, crustacea</i> | 2,380.00             | 168               | 10      | 2            | 119.00                     |
| Kennedy et al. [5]    | CNT | EC50            | <i>Ceriodaphnia dubia, crustacea</i> | 50,900.00            | 48                | 10      | 10           | 509.00                     |
| Long [6]              | CNT | IC50            | <i>Chlorella sp.</i>                 | 12,400.00            | 96                | 1       | 10           | 1,240.00                   |
| Schwab et al. [7]     | CNT | NOEC            | <i>Chlorella vulgaris</i>            | 42.00                | 96                | 1       | 1            | 42.00                      |
| Schwab et al. [7]     | CNT | NOEC            | <i>Chlorella vulgaris</i>            | 180.00               | 96                | 1       | 1            | 180.00                     |
| Schwab et al. [7]     | CNT | NOEC            | <i>Chlorella vulgaris</i>            | 1,000.00             | 96                | 1       | 1            | 1,000.00                   |
| Schwab et al. [7]     | CNT | NOEC            | <i>Chlorella vulgaris</i>            | 3,000.00             | 96                | 1       | 1            | 3,000.00                   |
| Schwab et al. [7]     | CNT | NOEC            | <i>Chlorella vulgaris</i>            | 3,000.00             | 96                | 1       | 1            | 3,000.00                   |
| Asharani et al. [8]   | CNT | NOEC            | <i>Danio rerio, Zebrafish</i>        | 40,000.00            | 72                | 10      | 1            | 4,000.00                   |
| Cheng et al. [9]      | CNT | LOEC            | <i>Danio rerio, Zebrafish</i>        | 120,000.00           | 72                | 10      | 2            | 6,000.00                   |
| Zhu et al. [10]       | CNT | EC50            | <i>Daphnia magna, crustacea</i>      | 1,306.00             | 48                | 10      | 10           | 13.06                      |
| Edgington et al. [11] | CNT | LC50            | <i>Daphnia magna, crustacea</i>      | 2,000.00             | 96                | 10      | 10           | 20.00                      |
| Zhu et al. [10]       | CNT | EC50            | <i>Daphnia magna, crustacea</i>      | 8,726.00             | 48                | 10      | 10           | 87.26                      |
| Alloy, et.al. [4]     | CNT | LOEC            | <i>Daphnia magna, crustacea</i>      | 240.00               | 504               | 1       | 2            | 120.00                     |

|                         |            |       |                                               |               |     |    |    |            |
|-------------------------|------------|-------|-----------------------------------------------|---------------|-----|----|----|------------|
| Roberts et al. [12]     | CNT        | NOEC  | <i>Daphnia magna, crustacea</i>               | 5,000.00      | 96  | 10 | 1  | 500.00     |
| Schwab et al. [7]       | CNT        | NOEC  | <i>Pseudokirchneriella subcapitata</i>        | 1,300.00      | 96  | 1  | 1  | 1,300.00   |
| Schwab et al. [7]       | CNT        | NOEC  | <i>Pseudokirchneriella subcapitata</i>        | 3,000.00      | 96  | 1  | 1  | 3,000.00   |
| Bayat, et.al. [13]      | CNT        | LED   | <i>Saccharomyces cerevisiae</i>               | 7,800.00      | 16  | 10 | 2  | 390.00     |
| Zhu et al. [14]         | CNT        | NOEC  | <i>Stylonychia Mytilus</i>                    | 500.00        | 120 | 1  | 1  | 500.00     |
| Ghafari et al. [15]     | CNT        | LOEC  | <i>Tetrahymena thermophila, protozoa</i>      | 3,600.00      | 72  | 1  | 2  | 1,800.00   |
| Mouchet, et.al. [16]    | CNT        | LOEC  | <i>Xenopus laevis, amphibian</i>              | 10,000.00     | 288 | 10 | 2  | 500.00     |
| Mouchet, et.al. [17]    | CNT        | LOEC  | <i>Xenopus laevis, amphibian</i>              | 50,000.00     | 288 | 10 | 2  | 2,500.00   |
| Fang, et.al. [18]       | Fullerenes | MIC   | <i>Bacillus subtilis, bacteria</i>            | 612.37        | 14  | 10 | 2  | 30.62      |
| Zhu et al. [19]         | Fullerenes | NOEC  | <i>Carassius auratus</i>                      | 40.00         | 768 | 1  | 1  | 40.00      |
| Luo et al. [20]         | Fullerenes | LOEC  | <i>Chlamydomonas reinhardtii, unicellular</i> | 1,000.00      | 24  | 10 | 2  | 50.00      |
| Isaacson et al. [21]    | Fullerenes | LC50  | <i>Danio rerio, Zebrafish</i>                 | 130.00        | 12  | 10 | 10 | 1.30       |
| Usenko et al. [22]      | Fullerenes | NOEC  | <i>Danio rerio, Zebrafish</i>                 | 100.00        | 24  | 10 | 1  | 10.00      |
| Seda [23]               | Fullerenes | LC50  | <i>Daphnia magna, crustacea</i>               | 400.00        | 96  | 10 | 10 | 4.00       |
| Tao, et.al. [24]        | Fullerenes | LOEC  | <i>Daphnia magna, crustacea</i>               | 200.00        | 48  | 10 | 2  | 10.00      |
| Lovern et al. [25]      | Fullerenes | NOEC  | <i>Daphnia magna, crustacea</i>               | 200.00        | 48  | 10 | 1  | 20.00      |
| Zhu et al. [26]         | Fullerenes | NOEC  | <i>Daphnia magna, crustacea</i>               | 500.00        | 192 | 10 | 1  | 50.00      |
| Zhu et al. [27]         | Fullerenes | EC50  | <i>Daphnia magna, crustacea</i>               | 9,344.00      | 48  | 10 | 10 | 93.44      |
| Oberdörster et al. [28] | Fullerenes | HONEC | <i>Daphnia magna, crustacea</i>               | 5,000.00      | 504 | 1  | 1  | 5,000.00   |
| Ivask, et.al. [29]      | Fullerenes | EC50  | <i>Escherichia coli</i>                       | 20,800,000.00 | 2   | 10 | 10 | 208,000.00 |

|                          |            |       |                                               |           |      |    |    |          |
|--------------------------|------------|-------|-----------------------------------------------|-----------|------|----|----|----------|
| Oberdörster, et al. [30] | Fullerenes | LOEC  | <i>Micropterus salmoides, Largemouth bass</i> | 500.00    | 48   | 10 | 2  | 25.00    |
| Oberdörster et al. [28]  | Fullerenes | HONEC | <i>Oryzias latipes, japanese rice fish</i>    | 500.00    | 96   | 10 | 1  | 50.00    |
| Oberdörster et al. [28]  | Fullerenes | HONEC | <i>Pimephales promelas, fathead minnow</i>    | 500.00    | 96   | 10 | 1  | 50.00    |
| Fang, et al. [18]        | Fullerenes | MIC   | <i>Pseudomonas putida, bacteria</i>           | 353.55    | 14   | 10 | 2  | 17.68    |
| Gao, et al. [31]         | Nano-Ag    | HONEC | <i>ammonia-oxidizing bacteria (AOB)</i>       | 200.00    | 408  | 1  | 1  | 200.00   |
| Luo, et al. [32]         | Nano-Ag    | HONEC | <i>ammonia-oxidizing bacteria (AOB)</i>       | 2,000.00  | 1080 | 1  | 1  | 2,000.00 |
| Jin [33]                 | Nano-Ag    | IC50  | <i>Bacillus subtilis, bacteria</i>            | 3,000.00  | 24   | 10 | 10 | 30.00    |
| Yoon et al. [34]         | Nano-Ag    | LC50  | <i>Bacillus subtilis, bacteria</i>            | 11,000.00 | 24   | 10 | 10 | 110.00   |
| Jin [33]                 | Nano-Ag    | IC50  | <i>Bacillus subtilis, bacteria</i>            | 46,000.00 | 24   | 10 | 10 | 460.00   |
| Roh et al. [35]          | Nano-Ag    | LOEC  | <i>Caenorhabditis elegans, roundworm</i>      | 100.00    | 72   | 10 | 2  | 5.00     |
| Kim et al. [36]          | Nano-Ag    | NOEC  | <i>Caenorhabditis elegans, roundworm</i>      | 1,000.00  | 24   | 10 | 10 | 10.00    |
| Meyer et al. [37]        | Nano-Ag    | LOEC  | <i>Caenorhabditis elegans, roundworm</i>      | 5,000.00  | 48   | 10 | 2  | 250.00   |
| Kim et al. [36]          | Nano-Ag    | LC50  | <i>Caenorhabditis elegans, roundworm</i>      | 55,000.00 | 24   | 10 | 10 | 550.00   |
| Angel [38]               | Nano-Ag    | IC50  | <i>Ceriodaphnia dubia, crustacea</i>          | 0.15      | 72   | 10 | 10 | 0.002    |
| Gao et al. [39]          | Nano-Ag    | LC50  | <i>Ceriodaphnia dubia, crustacea</i>          | 0.69      | 48   | 10 | 10 | 0.01     |
| Gao et al. [39]          | Nano-Ag    | LC50  | <i>Ceriodaphnia dubia, crustacea</i>          | 0.77      | 48   | 10 | 10 | 0.01     |
| Angel [38]               | Nano-Ag    | IC50  | <i>Ceriodaphnia dubia, crustacea</i>          | 2.00      | 72   | 10 | 10 | 0.02     |
| Kennedy et al. [40]      | Nano-Ag    | LC50  | <i>Ceriodaphnia dubia, crustacea</i>          | 3.00      | 48   | 10 | 10 | 0.03     |

|                     |         |       |                                               |          |    |    |    |        |
|---------------------|---------|-------|-----------------------------------------------|----------|----|----|----|--------|
| Kennedy et al. [40] | Nano-Ag | LC50  | <i>Ceriodaphnia dubia, crustacea</i>          | 4.80     | 48 | 10 | 10 | 0.05   |
| Gao et al. [39]     | Nano-Ag | LC50  | <i>Ceriodaphnia dubia, crustacea</i>          | 6.18     | 48 | 10 | 10 | 0.06   |
| Kennedy et al. [40] | Nano-Ag | LC50  | <i>Ceriodaphnia dubia, crustacea</i>          | 8.80     | 48 | 10 | 10 | 0.09   |
| Kennedy et al. [40] | Nano-Ag | LC50  | <i>Ceriodaphnia dubia, crustacea</i>          | 10.00    | 48 | 10 | 10 | 0.10   |
| Kennedy et al. [40] | Nano-Ag | LC50  | <i>Ceriodaphnia dubia, crustacea</i>          | 11.00    | 48 | 10 | 10 | 0.11   |
| Kennedy et al. [40] | Nano-Ag | LC50  | <i>Ceriodaphnia dubia, crustacea</i>          | 19.00    | 48 | 10 | 10 | 0.19   |
| Kennedy et al. [40] | Nano-Ag | LC50  | <i>Ceriodaphnia dubia, crustacea</i>          | 26.00    | 48 | 10 | 10 | 0.26   |
| Kennedy et al. [40] | Nano-Ag | LC50  | <i>Ceriodaphnia dubia, crustacea</i>          | 26.70    | 48 | 10 | 10 | 0.27   |
| Kennedy et al. [40] | Nano-Ag | LC50  | <i>Ceriodaphnia dubia, crustacea</i>          | 29.00    | 48 | 10 | 10 | 0.29   |
| Kennedy et al. [40] | Nano-Ag | LC50  | <i>Ceriodaphnia dubia, crustacea</i>          | 38.10    | 48 | 10 | 10 | 0.38   |
| Kennedy et al. [40] | Nano-Ag | LC50  | <i>Ceriodaphnia dubia, crustacea</i>          | 41.40    | 48 | 10 | 10 | 0.41   |
| Kennedy et al. [40] | Nano-Ag | LC50  | <i>Ceriodaphnia dubia, crustacea</i>          | 45.00    | 48 | 10 | 10 | 0.45   |
| Griffit et al. [41] | Nano-Ag | LC50  | <i>Ceriodaphnia dubia, crustacea</i>          | 67.00    | 48 | 10 | 10 | 0.67   |
| McLaughlin [42]     | Nano-Ag | LC50  | <i>Ceriodaphnia dubia, crustacea</i>          | 433.00   | 48 | 10 | 10 | 4.33   |
| Nair, et.al. [43]   | Nano-Ag | HONEC | <i>Chironomus riparius</i>                    | 1,000.00 | 24 | 10 | 1  | 100.00 |
| Navarro et al. [44] | Nano-Ag | EC50  | <i>Chlamydomonas reinhardtii, unicellular</i> | 0.86     | 5  | 10 | 10 | 0.01   |
| Navarro [44]        | Nano-Ag | EC50  | <i>Chlamydomonas reinhardtii, unicellular</i> | 3.53     | 1  | 10 | 10 | 0.04   |
| Navarro [44]        | Nano-Ag | EC50  | <i>Chlamydomonas reinhardtii, unicellular</i> | 6.10     | 1  | 10 | 10 | 0.06   |

|                    |         |      |                                                 |          |    |    |    |       |
|--------------------|---------|------|-------------------------------------------------|----------|----|----|----|-------|
| Wang et al. [45]   | Nano-Ag | EC50 | <i>Chydorus sphaericus (cladoceran species)</i> | 8.63     | 48 | 10 | 10 | 0.09  |
| Wang et al. [45]   | Nano-Ag | EC50 | <i>Chydorus sphaericus (cladoceran species)</i> | 12.94    | 48 | 10 | 10 | 0.13  |
| Wang et al. [45]   | Nano-Ag | EC50 | <i>Chydorus sphaericus (cladoceran species)</i> | 30.20    | 48 | 10 | 10 | 0.30  |
| Massarsky [46]     | Nano-Ag | LC50 | <i>Danio rerio, Zebrafish</i>                   | 1.18     | 96 | 10 | 10 | 0.01  |
| Kaewamatawong [47] | Nano-Ag | LC50 | <i>Danio rerio, Zebrafish</i>                   | 1.78     | 48 | 10 | 10 | 0.02  |
| Cunningham [48]    | Nano-Ag | EC50 | <i>Danio rerio, Zebrafish</i>                   | 8.45     | 48 | 10 | 10 | 0.08  |
| Cunningham [48]    | Nano-Ag | EC50 | <i>Danio rerio, Zebrafish</i>                   | 34.50    | 48 | 10 | 10 | 0.35  |
| Cunningham [48]    | Nano-Ag | EC50 | <i>Danio rerio, Zebrafish</i>                   | 45.50    | 48 | 10 | 10 | 0.46  |
| Cunningham [48]    | Nano-Ag | EC50 | <i>Danio rerio, Zebrafish</i>                   | 61.00    | 48 | 10 | 10 | 0.61  |
| Wang et al. [45]   | Nano-Ag | EC50 | <i>Danio rerio, Zebrafish</i>                   | 84.14    | 48 | 10 | 10 | 0.84  |
| Bilberg [49]       | Nano-Ag | LC50 | <i>Danio rerio, Zebrafish</i>                   | 89.00    | 48 | 10 | 10 | 0.89  |
| Wang et al. [45]   | Nano-Ag | EC50 | <i>Danio rerio, Zebrafish</i>                   | 146.70   | 48 | 10 | 10 | 1.47  |
| Wang et al. [45]   | Nano-Ag | EC50 | <i>Danio rerio, Zebrafish</i>                   | 173.67   | 48 | 10 | 10 | 1.74  |
| Cunningham [48]    | Nano-Ag | EC50 | <i>Danio rerio, Zebrafish</i>                   | 205.00   | 48 | 10 | 10 | 2.05  |
| Cunningham [48]    | Nano-Ag | EC50 | <i>Danio rerio, Zebrafish</i>                   | 228.00   | 48 | 10 | 10 | 2.28  |
| Cunningham [48]    | Nano-Ag | EC50 | <i>Danio rerio, Zebrafish</i>                   | 351.00   | 48 | 10 | 10 | 3.51  |
| Cunningham [48]    | Nano-Ag | EC50 | <i>Danio rerio, Zebrafish</i>                   | 370.00   | 48 | 10 | 10 | 3.70  |
| Muth-Köhne [50]    | Nano-Ag | EC50 | <i>Danio rerio, Zebrafish</i>                   | 1,000.00 | 48 | 10 | 10 | 10.00 |
| Muth-Köhne [50]    | Nano-Ag | EC50 | <i>Danio rerio, Zebrafish</i>                   | 1,200.00 | 24 | 10 | 10 | 12.00 |
| Muth-Köhne [50]    | Nano-Ag | LC50 | <i>Danio rerio, Zebrafish</i>                   | 1,200.00 | 48 | 10 | 10 | 12.00 |

|                       |         |      |                                  |            |     |    |    |          |
|-----------------------|---------|------|----------------------------------|------------|-----|----|----|----------|
| Muth-Köhne [50]       | Nano-Ag | LC50 | <i>Danio rerio, Zebrafish</i>    | 1,900.00   | 24  | 10 | 10 | 19.00    |
| van Aerle [51]        | Nano-Ag | LC50 | <i>Danio rerio, Zebrafish</i>    | 1,912.80   | 48  | 10 | 10 | 19.13    |
| Cunningham [48]       | Nano-Ag | EC50 | <i>Danio rerio, Zebrafish</i>    | 2,427.00   | 48  | 10 | 10 | 24.27    |
| Cunningham [48]       | Nano-Ag | EC50 | <i>Danio rerio, Zebrafish</i>    | 3,043.00   | 48  | 10 | 10 | 30.43    |
| Cunningham [48]       | Nano-Ag | EC50 | <i>Danio rerio, Zebrafish</i>    | 3,091.00   | 48  | 10 | 10 | 30.91    |
| Cunningham [48]       | Nano-Ag | EC50 | <i>Danio rerio, Zebrafish</i>    | 3,455.00   | 48  | 10 | 10 | 34.55    |
| Cunningham [48]       | Nano-Ag | EC50 | <i>Danio rerio, Zebrafish</i>    | 5,891.00   | 48  | 10 | 10 | 58.91    |
| Cunningham [48]       | Nano-Ag | EC50 | <i>Danio rerio, Zebrafish</i>    | 6,922.00   | 48  | 10 | 10 | 69.22    |
| Griffit et al. [41]   | Nano-Ag | LC50 | <i>Danio rerio, Zebrafish</i>    | 7,070.00   | 48  | 10 | 10 | 70.70    |
| Asharani et al. [52]  | Nano-Ag | LC50 | <i>Danio rerio, Zebrafish</i>    | 35,355.34  | 72  | 10 | 10 | 353.55   |
| Choi, et.al. [53]     | Nano-Ag | LC50 | <i>Danio rerio, Zebrafish</i>    | 250,000.00 | 24  | 10 | 10 | 2,500.00 |
| Völker [54]           | Nano-Ag | EC10 | <i>Daphnia galeata crustacea</i> | 11.00      | 48  | 10 | 2  | 0.55     |
| Völker [54]           | Nano-Ag | EC10 | <i>Daphnia galeata crustacea</i> | 3.45       | 504 | 1  | 2  | 1.73     |
| Lee[55]               | Nano-Ag | EC50 | <i>Daphnia magna, crustacea</i>  | 0.75       | 48  | 10 | 10 | 0.01     |
| Kim et al. [56]       | Nano-Ag | EC50 | <i>Daphnia magna, crustacea</i>  | 1.00       | 48  | 10 | 10 | 0.01     |
| Zhao et al. [57]      | Nano-Ag | LC50 | <i>Daphnia magna, crustacea</i>  | 1.10       | 48  | 10 | 10 | 0.01     |
| Allen, et.al. [58]    | Nano-Ag | LC50 | <i>Daphnia magna, crustacea</i>  | 1.10       | 48  | 10 | 10 | 0.01     |
| Georgantzopoulou [59] | Nano-Ag | EC50 | <i>Daphnia magna, crustacea</i>  | 1.20       | 48  | 10 | 10 | 0.01     |
| Kim et al. [56]       | Nano-Ag | EC50 | <i>Daphnia magna, crustacea</i>  | 1.40       | 48  | 10 | 10 | 0.01     |

|                     |         |      |                                 |      |    |    |    |      |
|---------------------|---------|------|---------------------------------|------|----|----|----|------|
| Poynton [60]        | Nano-Ag | EC50 | <i>Daphnia magna, crustacea</i> | 1.80 | 24 | 10 | 10 | 0.02 |
| Kennedy et al. [61] | Nano-Ag | LC50 | <i>Daphnia magna, crustacea</i> | 1.80 | 48 | 10 | 10 | 0.02 |
| Zhao et al. [57]    | Nano-Ag | LC50 | <i>Daphnia magna, crustacea</i> | 2.00 | 48 | 10 | 10 | 0.02 |
| Asghari [62]        | Nano-Ag | EC50 | <i>Daphnia magna, crustacea</i> | 2.00 | 48 | 10 | 10 | 0.02 |
| Newton [63]         | Nano-Ag | LC50 | <i>Daphnia magna, crustacea</i> | 2.14 | 48 | 10 | 10 | 0.02 |
| Newton [63]         | Nano-Ag | LC50 | <i>Daphnia magna, crustacea</i> | 2.27 | 48 | 10 | 10 | 0.02 |
| Das, et.al. [64]    | Nano-Ag | LC50 | <i>Daphnia magna, crustacea</i> | 2.75 | 48 | 10 | 10 | 0.03 |
| Newton [63]         | Nano-Ag | LC50 | <i>Daphnia magna, crustacea</i> | 3.16 | 48 | 10 | 10 | 0.03 |
| Newton [63]         | Nano-Ag | LC50 | <i>Daphnia magna, crustacea</i> | 3.41 | 48 | 10 | 10 | 0.03 |
| Li et al. [65]      | Nano-Ag | LC50 | <i>Daphnia magna, crustacea</i> | 3.46 | 48 | 10 | 10 | 0.03 |
| Newton [63]         | Nano-Ag | LC50 | <i>Daphnia magna, crustacea</i> | 3.48 | 48 | 10 | 10 | 0.03 |
| Li et al. [65]      | Nano-Ag | LC50 | <i>Daphnia magna, crustacea</i> | 4.00 | 48 | 10 | 10 | 0.04 |
| Asghari [62]        | Nano-Ag | EC50 | <i>Daphnia magna, crustacea</i> | 4.00 | 48 | 10 | 10 | 0.04 |
| Jo [66]             | Nano-Ag | EC50 | <i>Daphnia magna, crustacea</i> | 4.20 | 24 | 10 | 10 | 0.04 |
| Kennedy et al. [61] | Nano-Ag | LC50 | <i>Daphnia magna, crustacea</i> | 5.30 | 48 | 10 | 10 | 0.05 |
| Kennedy et al. [61] | Nano-Ag | LC50 | <i>Daphnia magna, crustacea</i> | 5.40 | 48 | 10 | 10 | 0.05 |
| Kennedy et al. [61] | Nano-Ag | LC50 | <i>Daphnia magna, crustacea</i> | 5.40 | 48 | 10 | 10 | 0.05 |
| Li et al. [65]      | Nano-Ag | LC50 | <i>Daphnia magna, crustacea</i> | 6.00 | 48 | 10 | 10 | 0.06 |
| Hoheisel [67]       | Nano-Ag | LC50 | <i>Daphnia magna, crustacea</i> | 7.00 | 48 | 10 | 10 | 0.07 |

|                       |         |      |                                 |       |     |    |    |      |
|-----------------------|---------|------|---------------------------------|-------|-----|----|----|------|
| Das, et.al. [64]      | Nano-Ag | NOEC | <i>Daphnia magna, crustacea</i> | 0.75  | 48  | 10 | 1  | 0.08 |
| Lee [55]              | Nano-Ag | EC50 | <i>Daphnia magna, crustacea</i> | 7.98  | 48  | 10 | 10 | 0.08 |
| Li et al. [65]        | Nano-Ag | LC50 | <i>Daphnia magna, crustacea</i> | 10.00 | 48  | 10 | 10 | 0.10 |
| Stensberg [68]        | Nano-Ag | LC50 | <i>Daphnia magna, crustacea</i> | 10.10 | 72  | 10 | 10 | 0.10 |
| Poynton [60]          | Nano-Ag | EC50 | <i>Daphnia magna, crustacea</i> | 10.60 | 24  | 10 | 10 | 0.11 |
| Kennedy et al. [61]   | Nano-Ag | LC50 | <i>Daphnia magna, crustacea</i> | 11.10 | 48  | 10 | 10 | 0.11 |
| Jo [66]               | Nano-Ag | EC50 | <i>Daphnia magna, crustacea</i> | 12.40 | 24  | 10 | 10 | 0.12 |
| Newton [63]           | Nano-Ag | LC50 | <i>Daphnia magna, crustacea</i> | 13.08 | 48  | 10 | 10 | 0.13 |
| Newton [63]           | Nano-Ag | LC50 | <i>Daphnia magna, crustacea</i> | 14.04 | 48  | 10 | 10 | 0.14 |
| Newton [63]           | Nano-Ag | LC50 | <i>Daphnia magna, crustacea</i> | 14.09 | 48  | 10 | 10 | 0.14 |
| Jo [66]               | Nano-Ag | EC50 | <i>Daphnia magna, crustacea</i> | 14.30 | 24  | 10 | 10 | 0.14 |
| Newton [63]           | Nano-Ag | LC50 | <i>Daphnia magna, crustacea</i> | 14.81 | 48  | 10 | 10 | 0.15 |
| Kennedy et al. [61]   | Nano-Ag | LC50 | <i>Daphnia magna, crustacea</i> | 14.90 | 48  | 10 | 10 | 0.15 |
| Kennedy et al. [61]   | Nano-Ag | LC50 | <i>Daphnia magna, crustacea</i> | 17.70 | 48  | 10 | 10 | 0.18 |
| Georgantzopoulou [59] | Nano-Ag | EC50 | <i>Daphnia magna, crustacea</i> | 20.00 | 48  | 10 | 10 | 0.20 |
| Hoheisel [67]         | Nano-Ag | LC50 | <i>Daphnia magna, crustacea</i> | 27.00 | 48  | 10 | 10 | 0.27 |
| Zhao et al. [57]      | Nano-Ag | LC50 | <i>Daphnia magna, crustacea</i> | 28.70 | 48  | 10 | 10 | 0.29 |
| Völker [54]           | Nano-Ag | EC10 | <i>Daphnia magna, crustacea</i> | 0.92  | 504 | 1  | 2  | 0.46 |
| Kennedy et al. [61]   | Nano-Ag | LC50 | <i>Daphnia magna, crustacea</i> | 97.00 | 48  | 10 | 10 | 0.97 |



|                                |         |       |                                 |            |     |    |    |          |
|--------------------------------|---------|-------|---------------------------------|------------|-----|----|----|----------|
| Georgantzopoulou [59]          | Nano-Ag | EC50  | <i>Daphnia magna, crustacea</i> | 120.00     | 48  | 10 | 10 | 1.20     |
| Asghari [62]                   | Nano-Ag | EC50  | <i>Daphnia magna, crustacea</i> | 187.00     | 48  | 10 | 10 | 1.87     |
| Zhao et al. [69]               | Nano-Ag | LOEC  | <i>Daphnia magna, crustacea</i> | 5.00       | 504 | 1  | 2  | 2.50     |
| Völker [54]                    | Nano-Ag | EC10  | <i>Daphnia magna, crustacea</i> | 60.30      | 48  | 10 | 2  | 3.02     |
| Jo [66]                        | Nano-Ag | EC50  | <i>Daphnia magna, crustacea</i> | 531.50     | 24  | 10 | 10 | 5.32     |
| Pokhrel [70]                   | Nano-Ag | EC50  | <i>Daphnia magna, crustacea</i> | 798.00     | 48  | 10 | 10 | 7.98     |
| Jo [66]                        | Nano-Ag | EC50  | <i>Daphnia magna, crustacea</i> | 1,153.90   | 24  | 10 | 10 | 11.54    |
| Jo [66]                        | Nano-Ag | EC50  | <i>Daphnia magna, crustacea</i> | 1,404.60   | 24  | 10 | 10 | 14.05    |
| Jo [66]                        | Nano-Ag | EC50  | <i>Daphnia magna, crustacea</i> | 3,844.10   | 24  | 10 | 10 | 38.44    |
| Zhao et al. [69]               | Nano-Ag | HONEC | <i>Daphnia magna, crustacea</i> | 500.00     | 48  | 10 | 1  | 50.00    |
| Blinova et al. [71]            | Nano-Ag | EC50  | <i>Daphnia magna, crustacea</i> | 40,200.00  | 48  | 10 | 10 | 402.00   |
| Blinova et al. [71]            | Nano-Ag | EC50  | <i>Daphnia magna, crustacea</i> | 49,400.00  | 48  | 10 | 10 | 494.00   |
| Blinova et al. [71]            | Nano-Ag | EC50  | <i>Daphnia magna, crustacea</i> | 263,300.00 | 48  | 10 | 10 | 2,633.00 |
| Völker [54]                    | Nano-Ag | EC10  | <i>Daphnia pulex, crustacea</i> | 4.37       | 48  | 10 | 2  | 0.22     |
| Griffit et al.                 | Nano-Ag | LC50  | <i>Daphnia pulex, crustacea</i> | 40.00      | 48  | 10 | 10 | 0.40     |
| Völker [54]                    | Nano-Ag | EC10  | <i>Daphnia pulex, crustacea</i> | 2.25       | 504 | 1  | 2  | 1.13     |
| Georgantzopoulou [59]          | Nano-Ag | EC50  | <i>Desmodesmus subspicatus</i>  | 34.00      | 72  | 1  | 10 | 3.40     |
| Georgantzopoulou [59]          | Nano-Ag | EC50  | <i>Desmodesmus subspicatus</i>  | 330.00     | 72  | 1  | 10 | 33.00    |
| Georgantzopoulou [59]          | Nano-Ag | EC50  | <i>Desmodesmus subspicatus</i>  | 2,200.00   | 72  | 1  | 10 | 220.00   |
| Martinez-Castañon, et.al. [72] | Nano-Ag | MIC   | <i>Escherichia coli</i>         | 6.25       | 24  | 10 | 2  | 0.31     |

|                         |         |       |                                            |           |     |    |    |           |
|-------------------------|---------|-------|--------------------------------------------|-----------|-----|----|----|-----------|
| Pokhrel [73]            | Nano-Ag | EC50  | <i>Escherichia coli</i>                    | 800.00    | 5   | 10 | 10 | 8.00      |
| Pokhrel [73]            | Nano-Ag | EC50  | <i>Escherichia coli</i>                    | 4,170.00  | 5   | 10 | 10 | 41.70     |
| Pokhrel [73]            | Nano-Ag | EC50  | <i>Escherichia coli</i>                    | 5,790.00  | 5   | 10 | 10 | 57.90     |
| Yoon et al. [34]        | Nano-Ag | LC50  | <i>Escherichia coli</i>                    | 31,000.00 | 24  | 10 | 10 | 310.00    |
| Ivask, et.al. [29]      | Nano-Ag | EC50  | <i>Escherichia coli</i>                    | 45,900.00 | 2   | 10 | 10 | 459.00    |
| Funck, et.al. [74]      | Nano-Ag | LC50  | <i>Gammarus fossaru, amphipod</i>          | 1.01      | 96  | 10 | 10 | 0.01      |
| Gubbins, et.al. [75]    | Nano-Ag | EC50  | <i>Lemna minor, duck weed</i>              | 19.06     | 336 | 10 | 10 | 0.19      |
| Kim et al. [76]         | Nano-Ag | NOEC  | <i>Lemna paucicostata, duck weed</i>       | 100.00    | 168 | 10 | 1  | 10.00     |
| Ali, et.al. [77]        | Nano-Ag | LC50  | <i>Lymnaea luteola, snail</i>              | 48.10     | 96  | 10 | 10 | 0.48      |
| Miao [78]               | Nano-Ag | EC50  | <i>Ochromonas danica, chrysophyte</i>      | 5.30      | 48  | 10 | 10 | 0.05      |
| Govindasamy, et al [79] | Nano-Ag | LC50  | <i>Oreochromis mossambicus, tilapia</i>    | 12,600.00 | 192 | 10 | 10 | 126.00    |
| Kim et al. [56]         | Nano-Ag | LC50  | <i>Oryzias latipes, japanese rice fish</i> | 28.00     | 96  | 10 | 10 | 0.28      |
| Chae [80]               | Nano-Ag | LC50  | <i>Oryzias latipes, japanese rice fish</i> | 34.60     | 96  | 10 | 10 | 0.35      |
| Kim et al. [56]         | Nano-Ag | LC50  | <i>Oryzias latipes, japanese rice fish</i> | 67.00     | 96  | 10 | 10 | 0.67      |
| Wu, et.al. [81]         | Nano-Ag | LC50  | <i>Oryzias latipes, japanese rice fish</i> | 1,030.00  | 48  | 10 | 10 | 10.30     |
| Kashiwada, et.al. [82]  | Nano-Ag | LC50  | <i>Oryzias latipes, japanese rice fish</i> | 1,390.00  | 96  | 10 | 10 | 13.90     |
| Kim et al. [83]         | Nano-Ag | LC50  | <i>Oryzias latipes, japanese rice fish</i> | 1,440.00  | 96  | 10 | 10 | 14.40     |
| Kvitek et al. [84]      | Nano-Ag | LC50  | <i>Paramecium caudatum</i>                 | 39,000.00 | 1   | 10 | 10 | 390.00    |
| Kvitek et al. [84]      | Nano-Ag | NOEC  | <i>Paramecium caudatum</i>                 | 25,000.00 | 168 | 1  | 1  | 25,000.00 |
| Bilberg [85]            | Nano-Ag | HONEC | <i>Perca fluviatilis</i>                   | 300.00    | 20  | 10 | 1  | 30.00     |
| Angel [38]              | Nano-Ag | IC50  | <i>Phaeodactylum tricornutum</i>           | 2,380.00  | 72  | 1  | 10 | 238.00    |

|                        |         |      |                                            |           |     |    |    |           |
|------------------------|---------|------|--------------------------------------------|-----------|-----|----|----|-----------|
| Angel [38]             | Nano-Ag | IC50 | <i>Phaeodactylum tricornutum</i>           | 3,690.00  | 72  | 1  | 10 | 369.00    |
| Kennedy et al. [61]    | Nano-Ag | LC50 | <i>Pimephales promelas, fathead minnow</i> | 9.00      | 48  | 10 | 10 | 0.09      |
| Kennedy et al. [61]    | Nano-Ag | LC50 | <i>Pimephales promelas, fathead minnow</i> | 19.20     | 48  | 10 | 10 | 0.19      |
| Kennedy et al. [61]    | Nano-Ag | LC50 | <i>Pimephales promelas, fathead minnow</i> | 41.00     | 48  | 10 | 10 | 0.41      |
| Kennedy et al. [61]    | Nano-Ag | LC50 | <i>Pimephales promelas, fathead minnow</i> | 55.20     | 48  | 10 | 10 | 0.55      |
| Kennedy et al. [61]    | Nano-Ag | LC50 | <i>Pimephales promelas, fathead minnow</i> | 60.70     | 48  | 10 | 10 | 0.61      |
| Kennedy et al. [61]    | Nano-Ag | LC50 | <i>Pimephales promelas, fathead minnow</i> | 64.10     | 48  | 10 | 10 | 0.64      |
| Kennedy et al. [61]    | Nano-Ag | LC50 | <i>Pimephales promelas, fathead minnow</i> | 69.90     | 48  | 10 | 10 | 0.70      |
| Hoheisel [67]          | Nano-Ag | LC50 | <i>Pimephales promelas, fathead minnow</i> | 89.40     | 96  | 10 | 10 | 0.89      |
| Kennedy et al. [61]    | Nano-Ag | LC50 | <i>Pimephales promelas, fathead minnow</i> | 125.80    | 48  | 10 | 10 | 1.26      |
| Hoheisel [67]          | Nano-Ag | EC20 | <i>Pimephales promelas, fathead minnow</i> | 46.10     | 168 | 10 | 2  | 2.31      |
| Laban et al. [86]      | Nano-Ag | LC50 | <i>Pimephales promelas, fathead minnow</i> | 1,250.00  | 96  | 10 | 10 | 12.50     |
| Laban et al. [86]      | Nano-Ag | LC50 | <i>Pimephales promelas, fathead minnow</i> | 1,303.84  | 96  | 10 | 10 | 13.04     |
| Laban et al. [86]      | Nano-Ag | LC50 | <i>Pimephales promelas, fathead minnow</i> | 1,360.00  | 96  | 10 | 10 | 13.60     |
| Laban et al. [86]      | Nano-Ag | LC50 | <i>Pimephales promelas, fathead minnow</i> | 9,400.00  | 96  | 10 | 10 | 94.00     |
| Laban et al. [86]      | Nano-Ag | LC50 | <i>Pimephales promelas, fathead minnow</i> | 9,981.98  | 96  | 10 | 10 | 99.82     |
| Laban et al. [86]      | Nano-Ag | LC50 | <i>Pimephales promelas, fathead minnow</i> | 10,600.00 | 96  | 10 | 10 | 106.00    |
| Angel [38]             | Nano-Ag | IC50 | <i>Pseudokirchneriella subcapitata</i>     | 3.00      | 72  | 1  | 10 | 0.30      |
| Angel [38]             | Nano-Ag | IC50 | <i>Pseudokirchneriella subcapitata</i>     | 19.50     | 72  | 1  | 10 | 1.95      |
| Griffit et al. [41]    | Nano-Ag | EC50 | <i>Pseudokirchneriella subcapitata</i>     | 190.00    | 96  | 1  | 10 | 19.00     |
| McLaughlin [42]        | Nano-Ag | IC50 | <i>Pseudokirchneriella subcapitata</i>     | 22,600.00 | 96  | 1  | 1  | 22,600.00 |
| Jin [33]               | Nano-Ag | IC50 | <i>Pseudomonas putida, bacteria</i>        | 3,000.00  | 24  | 10 | 10 | 30.00     |
| Jin [33]               | Nano-Ag | IC50 | <i>Pseudomonas putida, bacteria</i>        | 50,000.00 | 24  | 10 | 10 | 500.00    |
| Wang et al. [45]       | Nano-Ag | EC50 | <i>Raphidocelis subcapitata</i>            | 896.39    | 4.5 | 10 | 10 | 8.96      |
| Wang et al. [45]       | Nano-Ag | EC50 | <i>Raphidocelis subcapitata</i>            | 4,006.23  | 4.5 | 10 | 10 | 40.06     |
| Wang et al. [45]       | Nano-Ag | EC50 | <i>Raphidocelis subcapitata</i>            | 21,142.19 | 4.5 | 10 | 10 | 211.42    |
| Debabrata, et.al. [87] | Nano-Ag | MIC  | <i>Saccharomyces cerevisiae</i>            | 48.51     |     | 10 | 2  | 2.43      |
| Niazi, et.al. [88]     | Nano-Ag | EC30 | <i>Saccharomyces cerevisiae</i>            | 15,101.56 | 2   | 10 | 2  | 755.08    |

|                                |           |      |                                               |            |         |    |    |           |
|--------------------------------|-----------|------|-----------------------------------------------|------------|---------|----|----|-----------|
| Bayat, et.al. [13]             | Nano-Ag   | LED  | <i>Saccharomyces cerevisiae</i>               | 15,600.00  | 16      | 10 | 2  | 780.00    |
| Jiang [89]                     | Nano-Ag   | EC50 | <i>Spirodela polyrhiza, duckweed</i>          | 4,540.00   | 72      | 10 | 10 | 45.40     |
| Jiang [89]                     | Nano-Ag   | EC50 | <i>Spirodela polyrhiza, duckweed</i>          | 13,390.00  | 72      | 10 | 10 | 133.90    |
| Jiang [89]                     | Nano-Ag   | EC50 | <i>Spirodela polyrhiza, duckweed</i>          | 13,670.00  | 72      | 10 | 10 | 136.70    |
| Jiang [89]                     | Nano-Ag   | EC50 | <i>Spirodela polyrhiza, duckweed</i>          | 16,100.00  | 72      | 10 | 10 | 161.00    |
| Jiang [89]                     | Nano-Ag   | EC50 | <i>Spirodela polyrhiza, duckweed</i>          | 17,330.00  | 72      | 10 | 10 | 173.30    |
| Martinez-Castañon, et.al. [72] | Nano-Ag   | MIC  | <i>Staphylococcus aureus</i>                  | 7.50       | 24      | 10 | 2  | 0.38      |
| Burchardt[90]                  | Nano-Ag   | EC50 | <i>Synechococcus, bacteria sp.</i>            | 355.97     | 72      | 1  | 10 | 35.60     |
| Juganson [91]                  | Nano-Ag   | EC50 | <i>Tetrahymena thermophila, protozoa</i>      | 205,000.00 | 24      | 10 | 10 | 2,050.00  |
| Juganson [91]                  | Nano-Ag   | EC50 | <i>Tetrahymena thermophila, protozoa</i>      | 286,000.00 | 2       | 10 | 10 | 2,860.00  |
| Blinova et al. [71]            | Nano-Ag   | LC50 | <i>Thamnocephalus platyurus</i>               | 68,800.00  | 48      | 10 | 10 | 688.00    |
| Blinova et al. [71]            | Nano-Ag   | LC50 | <i>Thamnocephalus platyurus</i>               | 178,000.00 | 48      | 10 | 10 | 1,780.00  |
| Blinova et al. [71]            | Nano-Ag   | LC50 | <i>Thamnocephalus platyurus</i>               | 191,500.00 | 48      | 10 | 10 | 1,915.00  |
| Blinova et al. [71]            | Nano-Ag   | LC50 | <i>Thamnocephalus platyurus</i>               | 250,000.00 | 48      | 10 | 10 | 2,500.00  |
| Blinova et al. [71]            | Nano-Ag   | LC50 | <i>Thamnocephalus platyurus</i>               | 252,000.00 | 48      | 10 | 10 | 2,520.00  |
| Cherchi et al. [92]            | Nano-TiO2 | EC50 | <i>Anabaena variabilis</i>                    | 620.00     | 96      | 1  | 10 | 62.00     |
| Adams et al. [93]              | Nano-TiO2 | NOEC | <i>Bacillus subtilis, bacteria</i>            | 500,000.00 | 14 - 20 | 10 | 1  | 50,000.00 |
| Clement, et.al. [94]           | Nano-TiO2 | EC50 | <i>Brachionus plicatili, rotifer</i>          | 5,370.00   | 72      | 10 | 10 | 53.70     |
| Wu, et.al. [95]                | Nano-TiO2 | LOEC | <i>Caenorhabditis elegans, roundworm</i>      | 50.00      | 24      | 10 | 2  | 2.50      |
| Wang et al. [96]               | Nano-TiO2 | LC50 | <i>Caenorhabditis elegans, roundworm</i>      | 80,000.00  | 24      | 10 | 10 | 800.00    |
| Hall et al. [97]               | Nano-TiO2 | LC50 | <i>Ceriodaphnia dubia, crustacea</i>          | 7,600.00   | 48      | 10 | 10 | 76.00     |
| Hall et al. [97]               | Nano-TiO2 | IC25 | <i>Ceriodaphnia dubia, crustacea</i>          | 8,500.00   | 168     | 10 | 10 | 85.00     |
| Li et al. [3]                  | Nano-TiO2 | EC50 | <i>Ceriodaphnia dubia, crustacea</i>          | 42,000.00  | 48      | 10 | 10 | 420.00    |
| Wang et al. [98]               | Nano-TiO2 | LC50 | <i>Ceriodaphnia dubia, crustacea</i>          | 400,000.00 | 24      | 10 | 10 | 4,000.00  |
| Li et al. [99]                 | Nano-TiO2 | LC50 | <i>Chironomus dilutus</i>                     | 20,000.00  | 48      | 10 | 10 | 200.00    |
| Wang et al. [100]              | Nano-TiO2 | NOEC | <i>Chlamydomonas reinhardtii, unicellular</i> | 1,000.00   | 120     | 1  | 1  | 1,000.00  |
| Gunawan, et.al. [101]          | Nano-TiO2 | EC50 | <i>Chlamydomonas reinhardtii, unicellular</i> | 100,000.00 | 192     | 1  | 10 | 10,000.00 |
| Sadiq et al. [102]             | Nano-TiO2 | EC50 | <i>Chlorella sp.</i>                          | 16,120.00  | 72      | 1  | 10 | 1,612.00  |

|                         |           |       |                                   |               |      |    |    |            |
|-------------------------|-----------|-------|-----------------------------------|---------------|------|----|----|------------|
| Ji et al. [103]         | Nano-TiO2 | NOEC  | <i>Chlorella sp.</i>              | 16,000.00     | 144  | 1  | 1  | 16,000.00  |
| Cheng et al. [104]      | Nano-TiO2 | HONEC | <i>Danio rerio, Zebrafish</i>     | 500.00        | 4320 | 1  | 1  | 500.00     |
| Xiong et al. [105]      | Nano-TiO2 | LC50  | <i>Danio rerio, Zebrafish</i>     | 124,500.00    | 96   | 10 | 10 | 1,245.00   |
| Yang [106]              | Nano-TiO2 | LC50  | <i>Danio rerio, Zebrafish</i>     | 156,000.00    | 24   | 10 | 10 | 1,560.00   |
| Bar-Ilan [107]          | Nano-TiO2 | LC50  | <i>Danio rerio, Zebrafish</i>     | 300,000.00    | 24   | 10 | 10 | 3,000.00   |
| Zhu et al. [108]        | Nano-TiO2 | HONEC | <i>Danio rerio, Zebrafish</i>     | 500,000.00    | 96   | 10 | 1  | 50,000.00  |
| Ma, et.al [109]         | Nano-TiO2 | LC50  | <i>Daphnia magna, crustacea</i>   | 29.80         | 48   | 10 | 10 | 0.30       |
| Dabrunz et al. [110]    | Nano-TiO2 | EC50  | <i>Daphnia magna, crustacea</i>   | 240.00        | 96   | 10 | 10 | 2.40       |
| Zhu et al. [111]        | Nano-TiO2 | NOEC  | <i>Daphnia magna, crustacea</i>   | 100.00        | 72   | 10 | 1  | 10.00      |
| Clement, et.al. [94]    | Nano-TiO2 | EC50  | <i>Daphnia magna, crustacea</i>   | 1,300.00      | 72   | 10 | 10 | 13.00      |
| Dabrunz et al. [110]    | Nano-TiO2 | EC50  | <i>Daphnia magna, crustacea</i>   | 3,800.00      | 72   | 10 | 10 | 38.00      |
| Das, et.al. [64]        | Nano-TiO2 | LC50  | <i>Daphnia magna, crustacea</i>   | 7,750.00      | 48   | 10 | 10 | 77.50      |
| Zhu et al. [111]        | Nano-TiO2 | NOEC  | <i>Daphnia magna, crustacea</i>   | 100.00        | 504  | 1  | 1  | 100.00     |
| Warheit et al. [112]    | Nano-TiO2 | NOEC  | <i>Daphnia magna, crustacea</i>   | 1,000.00      | 48   | 10 | 1  | 100.00     |
| Lovern 2006[25]         | Nano-TiO2 | NOEC  | <i>Daphnia magna, crustacea</i>   | 1,000.00      | 48   | 10 | 1  | 100.00     |
| Kim et al. [113]        | Nano-TiO2 | LOEC  | <i>Daphnia magna, crustacea</i>   | 500.00        | 504  | 1  | 2  | 250.00     |
| Kim et al. [113]        | Nano-TiO2 | LOEC  | <i>Daphnia magna, crustacea</i>   | 5,000.00      | 48   | 10 | 2  | 250.00     |
| Jacobasch, et.al. [114] | Nano-TiO2 | EC50  | <i>Daphnia magna, crustacea</i>   | 2,930.00      | 504  | 1  | 10 | 293.00     |
| Amiano [115]            | Nano-TiO2 | EC50  | <i>Daphnia magna, crustacea</i>   | 29,700.00     | 48   | 10 | 10 | 297.00     |
| Zhu et al. [27]         | Nano-TiO2 | EC50  | <i>Daphnia magna, crustacea</i>   | 35,306.00     | 48   | 10 | 10 | 353.06     |
| Das, et.al. [64]        | Nano-TiO2 | NOEC  | <i>Daphnia magna, crustacea</i>   | 4,100.00      | 48   | 10 | 1  | 410.00     |
| Jacobasch, et.al. [114] | Nano-TiO2 | EC10  | <i>Daphnia magna, crustacea</i>   | 4,520.00      | 504  | 1  | 2  | 2,260.00   |
| Wiench et al. [116]     | Nano-TiO2 | NOEC  | <i>Daphnia magna, crustacea</i>   | 3,000.00      | 504  | 1  | 1  | 3,000.00   |
| Heinlaan et al. [117]   | Nano-TiO2 | LC50  | <i>Daphnia magna, crustacea</i>   | 20,000,000.00 | 48   | 10 | 10 | 200,000.00 |
| Hall et al. [97]        | Nano-TiO2 | LC50  | <i>Daphnia pulex, crustacea</i>   | 9,200.00      | 48   | 10 | 10 | 92.00      |
| Marcone [118]           | Nano-TiO2 | EC50  | <i>Daphnia similis, crustacea</i> | 12,500.00     | 48   | 10 | 10 | 125.00     |
| Hund-Rinke et al. [119] | Nano-TiO2 | EC50  | <i>Desmodesmus subspicatus</i>    | 44,000.00     | 72   | 1  | 10 | 4,400.00   |
| Bigorgne, et.al. [120]  | Nano-TiO2 | HONEC | <i>Eisenia fetida, earthworm</i>  | 10,000.00     | 24   | 10 | 1  | 1,000.00   |

|                         |           |       |                                            |               |         |    |    |              |
|-------------------------|-----------|-------|--------------------------------------------|---------------|---------|----|----|--------------|
| Dasari, et.al. [121]    | Nano-TiO2 | LC50  | <i>Escherichia coli</i>                    | 1,680.00      | 0.5     | 10 | 10 | 16.80        |
| Ivask, et.al. [29]      | Nano-TiO2 | EC50  | <i>Escherichia coli</i>                    | 20,000,000.00 | 2       | 10 | 10 | 200,000.00   |
| Adams et al. [93]       | Nano-TiO2 | NOEC  | <i>Escherichia coli</i>                    | 100,000.00    | 14 - 20 | 10 | 1  | 10,000.00    |
| Hu et al. [122]         | Nano-TiO2 | LD50  | <i>Escherichia coli</i>                    | 1,104,000.00  | 2       | 10 | 10 | 11,040.00    |
| Bundschuh, et.al. [123] | Nano-TiO2 | LOEC  | <i>Gammarus fossaru, amphipod</i>          | 200.00        | 168     | 10 | 2  | 10.00        |
| Zhu et al. [124]        | Nano-TiO2 | NOEC  | <i>Haliotis diversicolor supertexta</i>    | 2,000.00      | 10      | 10 | 1  | 200.00       |
| Zhu et al. [124]        | Nano-TiO2 | EC50  | <i>Haliotis diversicolor supertexta</i>    | 56,900.00     | 10      | 10 | 10 | 569.00       |
| Li et al. [99]          | Nano-TiO2 | LC50  | <i>Hyalella azteca, amphipod</i>           | 20,000.00     | 48      | 10 | 10 | 200.00       |
| Li et al. [125]         | Nano-TiO2 | LC50  | <i>Hyalella azteca, amphipod</i>           | 631,000.00    | 96      | 10 | 10 | 6,310.00     |
| Kim et al. [76]         | Nano-TiO2 | NOEC  | <i>Lemna paucicostata, duck weed</i>       | 125,000.00    | 168     | 10 | 1  | 12,500.00    |
| Li et al. [99]          | Nano-TiO2 | LC50  | <i>Lumbriculus variegatus</i>              | 20,000.00     | 48      | 10 | 10 | 200.00       |
| Federici, et. Al. [126] | Nano-TiO2 | HONEC | <i>Oncorhynchus mykiss</i>                 | 1,000.00      | 168     | 10 | 1  | 100.00       |
| Warheit et al. [112]    | Nano-TiO2 | NOEC  | <i>Oncorhynchus mykiss</i>                 | 1,000.00      | 96      | 10 | 1  | 100.00       |
| Ma, et.al[109]          | Nano-TiO2 | LC50  | <i>Oryzias latipes, japanese rice fish</i> | 2,460.00      | 96      | 10 | 10 | 24.60        |
| Li et al. [127]         | Nano-TiO2 | LC50  | <i>Paramecium multi-micronucleatum</i>     | 7,215,200.00  | 48      | 1  | 10 | 721,520.00   |
| Clement, et.al. [94]    | Nano-TiO2 | EC50  | <i>Phaeodactylum tricornutum</i>           | 10,910.00     | 72      | 1  | 10 | 1,091.00     |
| Hall et al. [97]        | Nano-TiO2 | IC25  | <i>Pimephales promelas, fathead minnow</i> | 452,000.00    | 168     | 10 | 10 | 4,520.00     |
| Hall et al. [97]        | Nano-TiO2 | LC50  | <i>Pimephales promelas, fathead minnow</i> | 500,000.00    | 48      | 10 | 10 | 5,000.00     |
| Jovanovic, et.al. [128] | Nano-TiO2 | HONEC | <i>Pimephales promelas, fathead minnow</i> | 1,000,000.00  | 168     | 10 | 1  | 100,000.00   |
| Lee [129]               | Nano-TiO2 | NOEC  | <i>Pseudokirchneriella subcapitata</i>     | 50.00         | 72      | 1  | 1  | 50.00        |
| Lee [129]               | Nano-TiO2 | EC50  | <i>Pseudokirchneriella subcapitata</i>     | 2,530.00      | 72      | 1  | 10 | 253.00       |
| Aruoja et al. [130]     | Nano-TiO2 | NOEC  | <i>Pseudokirchneriella subcapitata</i>     | 984.00        | 72      | 1  | 1  | 984.00       |
| Hall et al. [97]        | Nano-TiO2 | IC25  | <i>Pseudokirchneriella subcapitata</i>     | 1,500.00      | 96      | 1  | 1  | 1,500.00     |
| Warheit et al. [112]    | Nano-TiO2 | EC50  | <i>Pseudokirchneriella subcapitata</i>     | 16,000.00     | 72      | 1  | 10 | 1,600.00     |
| Hartmann et al. [131]   | Nano-TiO2 | EC50  | <i>Pseudokirchneriella subcapitata</i>     | 71,000.00     | 72      | 1  | 10 | 7,100.00     |
| Metzler et al. [132]    | Nano-TiO2 | EC50  | <i>Pseudokirchneriella subcapitata</i>     | 113,000.00    | 96      | 1  | 10 | 11,300.00    |
| Bayat, et.al. [13]      | Nano-TiO2 | LED   | <i>Saccharomyces cerevisiae</i>            | 7,800.00      | 16      | 10 | 2  | 390.00       |
| Kasemets [133]          | Nano-TiO2 | HONEC | <i>Saccharomyces cerevisiae</i>            | 20,000,000.00 | 24      | 10 | 1  | 2,000,000.00 |

|                          |                       |       |                                               |               |      |    |    |              |
|--------------------------|-----------------------|-------|-----------------------------------------------|---------------|------|----|----|--------------|
| Sadiq et al. [102]       | Nano-TiO <sub>2</sub> | EC50  | <i>Scenedesmus subspicatus</i>                | 21,200.00     | 72   | 1  | 10 | 2,120.00     |
| Velzeboer, et. Al. [134] | Nano-TiO <sub>2</sub> | HONEC | <i>soil bacteria</i>                          | 100,000.00    | 168  | 1  | 1  | 100,000.00   |
| Heinlaan et al. [117]    | Nano-TiO <sub>2</sub> | NOEC  | <i>Thamnocephalus platyurus</i>               | 20,000,000.00 | 24   | 10 | 1  | 2,000,000.00 |
| Nations, et.al. [135]    | Nano-TiO <sub>2</sub> | EC10  | <i>Xenopus laevis, amphibian</i>              | 1,000,000.00  | 96   | 10 | 2  | 50,000.00    |
| Li et al. [136]          | Nano-ZnO              | IC50  | <i>Bacillus subtilis, bacteria</i>            | 280.00        | 24   | 10 | 10 | 2.80         |
| Li et al. [136]          | Nano-ZnO              | IC50  | <i>Bacillus subtilis, bacteria</i>            | 310.00        | 24   | 10 | 10 | 3.10         |
| Li et al. [136]          | Nano-ZnO              | IC50  | <i>Bacillus subtilis, bacteria</i>            | 3,300.00      | 24   | 10 | 10 | 33.00        |
| Jones et al. [137]       | Nano-ZnO              | EC50  | <i>Bacillus subtilis, bacteria</i>            | 188,000.00    | 10   | 10 | 10 | 1,880.00     |
| Wu, et.al. [95]          | Nano-ZnO              | LOEC  | <i>Caenorhabditis elegans, roundworm</i>      | 50.00         | 24   | 10 | 2  | 2.50         |
| Wang et al. [96]         | Nano-ZnO              | LC50  | <i>Caenorhabditis elegans, roundworm</i>      | 2,300.00      | 24   | 10 | 10 | 23.00        |
| Ma et al. [138]          | Nano-ZnO              | EC50  | <i>Caenorhabditis elegans, roundworm</i>      | 46,000.00     | 24   | 10 | 10 | 460.00       |
| Ma et al. [139]          | Nano-ZnO              | LC50  | <i>Caenorhabditis elegans, roundworm</i>      | 70,000.00     | 24   | 10 | 10 | 700.00       |
| Gunawan, et.al. [101]    | Nano-ZnO              | EC50  | <i>Chlamydomonas reinhardtii, unicellular</i> | 10.00         | 192  | 1  | 10 | 1.00         |
| Luo et al. [20]          | Nano-ZnO              | LOEC  | <i>Chlamydomonas reinhardtii, unicellular</i> | 1,000.00      | 24   | 10 | 2  | 50.00        |
| Lin [140]                | Nano-ZnO              | IC50  | <i>Chlorella sp.</i>                          | 4,900.00      | 288  | 1  | 10 | 490.00       |
| Ji et al. [103]          | Nano-ZnO              | NOEC  | <i>Chlorella sp.</i>                          | 5,000.00      | 144  | 1  | 1  | 5,000.00     |
| Fabrega, et.al. [141]    | Nano-ZnO              | LOEC  | <i>Corophium volutator</i>                    | 200.00        | 2400 | 1  | 2  | 100.00       |
| Zhu et al. [108]         | Nano-ZnO              | LC50  | <i>Danio rerio, Zebrafish</i>                 | 1,800.00      | 96   | 10 | 10 | 18.00        |
| Yu [142]                 | Nano-ZnO              | LC50  | <i>Danio rerio, Zebrafish</i>                 | 3,969.00      | 96   | 10 | 10 | 39.69        |
| Xiong et al. [105]       | Nano-ZnO              | LC50  | <i>Danio rerio, Zebrafish</i>                 | 4,920.00      | 96   | 10 | 10 | 49.20        |
| Zhao et al. [143]        | Nano-ZnO              | NOEC  | <i>Daphnia magna, crustacea</i>               | 0.80          | 504  | 1  | 1  | 0.80         |
| Zhu et al. [10]          | Nano-ZnO              | EC50  | <i>Daphnia magna, crustacea</i>               | 622.00        | 48   | 10 | 10 | 6.22         |
| Wiench et al. [116]      | Nano-ZnO              | EC50  | <i>Daphnia magna, crustacea</i>               | 1,000.00      | 48   | 10 | 10 | 10.00        |
| Lopes, et.al. [144]      | Nano-ZnO              | EC50  | <i>Daphnia magna, crustacea</i>               | 125.00        | 504  | 1  | 10 | 12.50        |
| Blinova et al. [145]     | Nano-ZnO              | EC50  | <i>Daphnia magna, crustacea</i>               | 1,700.00      | 48   | 10 | 10 | 17.00        |
| Naddafi, et.al. [146]    | Nano-ZnO              | LC50  | <i>Daphnia magna, crustacea</i>               | 2,100.00      | 48   | 10 | 10 | 21.00        |
| Blinova et al. [145]     | Nano-ZnO              | EC50  | <i>Daphnia magna, crustacea</i>               | 2,600.00      | 48   | 10 | 10 | 26.00        |
| Blinova et al. [145]     | Nano-ZnO              | EC50  | <i>Daphnia magna, crustacea</i>               | 2,800.00      | 48   | 10 | 10 | 28.00        |

|                             |          |      |                                        |              |       |    |    |           |
|-----------------------------|----------|------|----------------------------------------|--------------|-------|----|----|-----------|
| Heinlaan et al. [117]       | Nano-ZnO | EC50 | <i>Daphnia magna, crustacea</i>        | 3,200.00     | 48    | 10 | 10 | 32.00     |
| Blinova et al. [145]        | Nano-ZnO | EC50 | <i>Daphnia magna, crustacea</i>        | 3,300.00     | 48    | 10 | 10 | 33.00     |
| Blinova et al. [145]        | Nano-ZnO | EC50 | <i>Daphnia magna, crustacea</i>        | 3,400.00     | 48    | 10 | 10 | 34.00     |
| Blinova et al. [145]        | Nano-ZnO | EC50 | <i>Daphnia magna, crustacea</i>        | 3,500.00     | 48    | 10 | 10 | 35.00     |
| Heinlaan et al. [117]       | Nano-ZnO | NOEC | <i>Daphnia magna, crustacea</i>        | 500.00       | 48    | 10 | 1  | 50.00     |
| Blinova et al. [145]        | Nano-ZnO | EC50 | <i>Daphnia magna, crustacea</i>        | 9,000.00     | 48    | 10 | 10 | 90.00     |
| Poynton et al. [147]        | Nano-ZnO | LC10 | <i>Daphnia magna, crustacea</i>        | 3,700.00     | 24    | 10 | 2  | 185.00    |
| Dasari, et.al. [121]        | Nano-ZnO | LC50 | <i>Escherichia coli</i>                | 48.00        | 0.5   | 10 | 10 | 0.48      |
| Emami-Karvani, et.al. [148] | Nano-ZnO | MIC  | <i>Escherichia coli</i>                | 1,000.00     | 24    | 10 | 2  | 50.00     |
| Li et al. [136]             | Nano-ZnO | IC50 | <i>Escherichia coli</i>                | 17,000.00    | 12    | 10 | 10 | 170.00    |
| Hu et al. [122]             | Nano-ZnO | LD50 | <i>Escherichia coli</i>                | 21,100.00    | 2     | 10 | 10 | 211.00    |
| Li et al. [136]             | Nano-ZnO | IC50 | <i>Escherichia coli</i>                | 34,000.00    | 12    | 10 | 10 | 340.00    |
| Pokhrel[73]                 | Nano-ZnO | EC50 | <i>Escherichia coli</i>                | 57,700.00    | 5     | 10 | 10 | 577.00    |
| Ivask, et.al. [29]          | Nano-ZnO | EC50 | <i>Escherichia coli</i>                | 67,200.00    | 2     | 10 | 10 | 672.00    |
| Adams et al. [93]           | Nano-ZnO | EC50 | <i>Escherichia coli</i>                | 1,240,000.00 | 14-20 | 10 | 10 | 12,400.00 |
| Poynton et al. [149]        | Nano-ZnO | LC50 | <i>Hyalella azteca, amphipod</i>       | 78.50        | 96    | 10 | 10 | 0.79      |
| Miller et al. [150]         | Nano-ZnO | NOEC | <i>Isochrysis galbana</i>              | 500.00       | 96    | 1  | 1  | 500.00    |
| Lin [151]                   | Nano-ZnO | IC50 | <i>Lolium perenne (ryegrass)</i>       | 20,000.00    | 120   | 10 | 10 | 200.00    |
| Lin [152]                   | Nano-ZnO | IC50 | <i>Lolium perenne (ryegrass)</i>       | 51,000.00    | 288   | 10 | 10 | 510.00    |
| Li et al. [127]             | Nano-ZnO | LC50 | <i>Paramecium multi-micronucleatum</i> | 573,800.00   | 48    | 1  | 10 | 57,380.00 |
| Franklin et al. [153]       | Nano-ZnO | IC50 | <i>Pseudokirchneriella subcapitata</i> | 49.00        | 72    | 1  | 10 | 4.90      |
| Aruoja et al. [130]         | Nano-ZnO | NOEC | <i>Pseudokirchneriella subcapitata</i> | 17.00        | 72    | 1  | 1  | 17.00     |
| Lee [154]                   | Nano-ZnO | NOEC | <i>Pseudokirchneriella subcapitata</i> | 50.00        | 72    | 1  | 1  | 50.00     |
| Lin [151]                   | Nano-ZnO | IC50 | <i>Raphanus sativus, radish</i>        | 50,000.00    | 120   | 10 | 10 | 500.00    |
| Kasemets [133]              | Nano-ZnO | EC50 | <i>Saccharomyces cerevisiae</i>        | 143,868.00   | 24    | 10 | 10 | 1,438.68  |
| Emami-Karvani, et.al. [148] | Nano-ZnO | MIC  | <i>Staphylococcus aureus</i>           | 500.00       | 24    | 10 | 2  | 25.00     |
| Jones et al. [137]          | Nano-ZnO | MIC  | <i>Staphylococcus aureus</i>           | 80,000.00    | 24    | 10 | 2  | 4,000.00  |



|                       |          |      |                                                     |              |    |    |    |           |
|-----------------------|----------|------|-----------------------------------------------------|--------------|----|----|----|-----------|
| Jones et al. [137]    | Nano-ZnO | MIC  | <i>Staphylococcus aureus</i>                        | 1,200,000.00 | 24 | 10 | 2  | 60,000.00 |
| Mortimer et al. [155] | Nano-ZnO | EC50 | <i>Tetrahymena thermophila</i> ,<br><i>protozoa</i> | 4,300.00     | 4  | 10 | 10 | 43.00     |
| Mortimer et al. [155] | Nano-ZnO | EC50 | <i>Tetrahymena thermophila</i> ,<br><i>protozoa</i> | 6,800.00     | 24 | 10 | 10 | 68.00     |
| Blinova et al. [145]  | Nano-ZnO | EC50 | <i>Tetrahymena thermophila</i> ,<br><i>protozoa</i> | 9,400.00     | 24 | 10 | 10 | 94.00     |
| Blinova et al. [145]  | Nano-ZnO | EC50 | <i>Tetrahymena thermophila</i> ,<br><i>protozoa</i> | 12,400.00    | 24 | 10 | 10 | 124.00    |
| Blinova et al. [71]   | Nano-ZnO | EC50 | <i>Tetrahymena thermophila</i> ,<br><i>protozoa</i> | 26,500.00    | 24 | 10 | 10 | 265.00    |
| Miller et al. [150]   | Nano-ZnO | NOEC | <i>Thalassiosira pseudonana</i>                     | 100.00       | 96 | 1  | 1  | 100.00    |
| Wong [156]            | Nano-ZnO | LC50 | <i>Thalassiosira pseudonana</i>                     | 3,280.00     | 96 | 1  | 10 | 328.00    |
| Jarvis [157]          | Nano-ZnO | NOEC | <i>Thalassiosira weissflogii</i>                    | 10.00        | 72 | 1  | 1  | 10.00     |
| Blinova et al. [145]  | Nano-ZnO | LC50 | <i>Thamnocephalus platyurus</i>                     | 140.00       | 24 | 10 | 10 | 1.40      |
| Heinlaan et al. [117] | Nano-ZnO | NOEC | <i>Thamnocephalus platyurus</i>                     | 30.00        | 24 | 10 | 1  | 3.00      |
| Blinova et al. [145]  | Nano-ZnO | LC50 | <i>Thamnocephalus platyurus</i>                     | 1,100.00     | 24 | 10 | 10 | 11.00     |
| Blinova et al. [145]  | Nano-ZnO | LC50 | <i>Thamnocephalus platyurus</i>                     | 1,400.00     | 24 | 10 | 10 | 14.00     |
| Blinova et al. [145]  | Nano-ZnO | LC50 | <i>Thamnocephalus platyurus</i>                     | 1,500.00     | 24 | 10 | 10 | 15.00     |
| Blinova et al. [145]  | Nano-ZnO | LC50 | <i>Thamnocephalus platyurus</i>                     | 3,600.00     | 24 | 10 | 10 | 36.00     |
| Blinova et al. [145]  | Nano-ZnO | LC50 | <i>Thamnocephalus platyurus</i>                     | 5,300.00     | 24 | 10 | 10 | 53.00     |
| Blinova et al. [145]  | Nano-ZnO | LC50 | <i>Thamnocephalus platyurus</i>                     | 6,000.00     | 24 | 10 | 10 | 60.00     |
| Nations, et.al. [135] | Nano-ZnO | EC10 | <i>Xenopus laevis</i> ,<br><i>amphibian</i>         | 1,300.00     | 96 | 10 | 2  | 65.00     |

Table S2: Data for soil toxicity for nano-Ag, nano-TiO<sub>2</sub>, nano-ZnO, CNT and Fullerenes.

| Author                       | ENM        | Dose descriptor | Test organism                           | Concentration (µg/kg) | Exposure time (h) | AF time | AF no-effect | Species sensitivity (µg/kg) |
|------------------------------|------------|-----------------|-----------------------------------------|-----------------------|-------------------|---------|--------------|-----------------------------|
| De La Torre-Roche [158]      | CNT        | HONEC           | <i>Curcubita pepo, zucchini</i>         | 5,000,000.00          | 672               | 1       | 1            | 5,000,000.00                |
| Scott-Fordsmand et al. [159] | CNT        | EC50            | <i>Eisenia veneta, earthworm</i>        | 176,000.00            | 672               | 1       | 10           | 17,600.00                   |
| De La Torre-Roche [158]      | CNT        | LOEC            | <i>Glycine max, soy bean</i>            | 1,000,000.00          | 672               | 1       | 2            | 500,000.00                  |
| Chung et al. [160]           | CNT        | LOEC            | microbial biomass (organic C and N)     | 500,000.00            | 480               | 1       | 2            | 250,000.00                  |
| Chung, et al. [160]          | CNT        | HONEC           | soil microbial community                | 50,000.00             | 264               | 1       | 1            | 50,000.00                   |
| Shrestha, et al. [161]       | CNT        | HONEC           | soil microbial community                | 1,000,000.00          | 2160              | 1       | 1            | 1,000,000.00                |
| De La Torre-Roche [158]      | CNT        | HONEC           | <i>Solanum lycopersicu, tomato</i>      | 5,000,000.00          | 672               | 1       | 1            | 5,000,000.00                |
| De La Torre-Roche [158]      | CNT        | LOEC            | <i>Zea may, maize</i>                   | 500,000.00            | 672               | 1       | 2            | 250,000.00                  |
| De La Torre-Roche [158]      | Fullerenes | HONEC           | <i>Curcubita pepo, zucchini</i>         | 5,000,000.00          | 672               | 1       | 1            | 5,000,000.00                |
| Scott-Fordsmand et al. [159] | Fullerenes | HONEC           | <i>Eisenia veneta, earthworm</i>        | 1,000,000.00          | 672               | 1       | 1            | 1,000,000.00                |
| Johansen et al. [162]        | Fullerenes | EC10            | fast growing soil microbacteria         | 50,000.00             | 3                 | 10      | 2            | 2,500.00                    |
| De La Torre-Roche [158]      | Fullerenes | LOEC            | <i>Glycine max, soy bean</i>            | 500,000.00            | 672               | 1       | 2            | 250,000.00                  |
| Van der Ploeg et al. [163]   | Fullerenes | NOEC            | <i>Lumbriculus rubellus (earthworm)</i> | 15,400.00             | 7824              | 1       | 1            | 15,400.00                   |
| Johansen et al. [162]        | Fullerenes | EC40            | slow growing soil microbacteria         | 50,000.00             | 336               | 1       | 10           | 5,000.00                    |
| Tong et al. [164]            | Fullerenes | HONEC           | soil microbial community                | 1,000,000.00          | 720               | 1       | 1            | 1,000,000.00                |
| De La Torre-Roche [158]      | Fullerenes | HONEC           | <i>Solanum lycopersicu, tomato</i>      | 5,000,000.00          | 672               | 1       | 1            | 5,000,000.00                |
| De La Torre-Roche [158]      | Fullerenes | LOEC            | <i>Zea may, maize</i>                   | 500,000.00            | 672               | 1       | 2            | 250,000.00                  |

|                             |           |       |                                         |               |      |    |    |              |
|-----------------------------|-----------|-------|-----------------------------------------|---------------|------|----|----|--------------|
| Schlich [165]               | Nano-Ag   | NOEC  | <i>Eisenia fetida, earthworm</i>        | 60,000.00     | 1344 | 1  | 1  | 60,000.00    |
| Shoultz-Wilson et al. [166] | Nano-Ag   | NOEC  | <i>Eisenia fetida, earthworm</i>        | 79,450.00     | 672  | 1  | 1  | 79,450.00    |
| Shoultz-Wilson et al. [166] | Nano-Ag   | NOEC  | <i>Eisenia fetida, earthworm</i>        | 84,150.00     | 672  | 1  | 1  | 84,150.00    |
| Gomes, et al. [167]         | Nano-Ag   | NOEC  | <i>Enchytraeus albidus, Oligochaete</i> | 100,000.00    | 1008 | 1  | 1  | 100,000.00   |
| Lee [168]                   | Nano-Ag   | NOEC  | <i>Phaseolus radiatus</i>               | 100,000.00    | 120  | 10 | 1  | 10,000.00    |
| Lee [168]                   | Nano-Ag   | NOEC  | <i>Sorghum bicolor</i>                  | 2,000,000.00  | 120  | 10 | 1  | 200,000.00   |
| Heckmann [169]              | Nano-TiO2 | EC50  | <i>Eisenia fetida, earthworm</i>        | 1,000,000.00  | 672  | 1  | 10 | 100,000.00   |
| Hu, et al. [170]            | Nano-TiO2 | LOEC  | <i>Eisenia fetida, earthworm</i>        | 5,000,000.00  | 168  | 10 | 2  | 250,000.00   |
| Canas, et al. [171]         | Nano-TiO2 | HONEC | <i>Eisenia fetida, earthworm</i>        | 10,000,000.00 | 336  | 10 | 1  | 1,000,000.00 |
| Nogueira, et al. [172]      | Nano-TiO2 | LOEC  | <i>soil microbial community</i>         | 5,000,000.00  | 720  | 1  | 2  | 2,500,000.00 |
| Hu, et al. [170]            | Nano-ZnO  | LOEC  | <i>Eisenia fetida, earthworm</i>        | 1,000,000.00  | 168  | 10 | 2  | 50,000.00    |
| Heggelund [173]             | Nano-ZnO  | EC50  | <i>Eisenia fetida, earthworm</i>        | 901,000.00    | 672  | 1  | 10 | 90,100.00    |
| Heggelund [173]             | Nano-ZnO  | EC50  | <i>Eisenia fetida, earthworm</i>        | 918,600.00    | 672  | 1  | 10 | 91,860.00    |
| Heggelund [173]             | Nano-ZnO  | EC50  | <i>Eisenia fetida, earthworm</i>        | 2,874,000.00  | 672  | 1  | 10 | 287,400.00   |
| Canas, et al. [171]         | Nano-ZnO  | HONEC | <i>Eisenia fetida, earthworm</i>        | 10,000,000.00 | 336  | 10 | 1  | 1,000,000.00 |
| Hooper et al. [174]         | Nano-ZnO  | EC50  | <i>Eisenia veneta, earthworm</i>        | 750,000.00    | 504  | 10 | 10 | 7,500.00     |
| Waalewijn-Kool [175]        | Nano-ZnO  | EC50  | <i>Folsomia candida, springtail</i>     | 553,000.00    | 672  | 1  | 10 | 55,300.00    |
| Waalewijn-Kool [176]        | Nano-ZnO  | EC50  | <i>Folsomia candida, springtail</i>     | 749,000.00    | 2160 | 1  | 10 | 74,900.00    |
| Waalewijn-Kool [176]        | Nano-ZnO  | EC50  | <i>Folsomia candida, springtail</i>     | 873,000.00    | 672  | 1  | 10 | 87,300.00    |
| Waalewijn-Kool [175]        | Nano-ZnO  | EC50  | <i>Folsomia candida, springtail</i>     | 1,481,000.00  | 672  | 1  | 10 | 148,100.00   |
| Waalewijn-Kool [176]        | Nano-ZnO  | EC50  | <i>Folsomia candida, springtail</i>     | 1,817,000.00  | 8760 | 1  | 10 | 181,700.00   |

|                        |          |      |                                        |               |      |    |    |            |
|------------------------|----------|------|----------------------------------------|---------------|------|----|----|------------|
| Waalewijn-Kool [176]   | Nano-ZnO | EC50 | <i>Folsomia candida, springtail</i>    | 1,964,000.00  | 672  | 1  | 10 | 196,400.00 |
| Waalewijn-Kool [176]   | Nano-ZnO | EC50 | <i>Folsomia candida, springtail</i>    | 2,847,000.00  | 2160 | 1  | 10 | 284,700.00 |
| Waalewijn-Kool [175]   | Nano-ZnO | EC50 | <i>Folsomia candida, springtail</i>    | 3,233,000.00  | 672  | 1  | 10 | 323,300.00 |
| Waalewijn-Kool [176]   | Nano-ZnO | EC50 | <i>Folsomia candida, springtail</i>    | 5,855,000.00  | 8760 | 1  | 10 | 585,500.00 |
| Kool [177]             | Nano-ZnO | EC10 | <i>Folsomia candida, springtail</i>    | 1,678,000.00  | 672  | 1  | 2  | 839,000.00 |
| Manzo et al. [178]     | Nano-ZnO | EC25 | <i>Lepidium sativum (garden cress)</i> | 286,000.00    | 72   | 10 | 10 | 2,860.00   |
| Tourinho, et.al. [179] | Nano-ZnO | EC50 | <i>Porcellionides pruinosus</i>        | 119,000.00    | 336  | 10 | 10 | 1,190.00   |
| Rousk [180]            | Nano-ZnO | EC50 | soil bacteria                          | 5,184,000.00  | 5    | 10 | 10 | 51,840.00  |
| Rousk [180]            | Nano-ZnO | EC50 | soil bacteria                          | 12,025,000.00 | 5    | 10 | 10 | 120,250.00 |

Table S3: Data for sediment toxicity for nano-Ag, nano-TiO<sub>2</sub>, nano-ZnO, CNT and Fullerenes.

| Author                 | ENM                   | Dose descriptor | Test organism                             | Concentration (µg/kg) | Exposure time (h) | AF time | AF no-effect | Species sensitivity (µg/kg) |
|------------------------|-----------------------|-----------------|-------------------------------------------|-----------------------|-------------------|---------|--------------|-----------------------------|
| Petersen, et.al. [181] | CNT                   | HONEC           | <i>Lumbriculus variegatus</i> , earthworm | 30,000.00             | 672               | 1       | 1            | 30,000.00                   |
| Petersen, et.al. [181] | CNT                   | HONEC           | <i>Lumbriculus variegatus</i>             | 370,000.00            | 672               | 1       | 1            | 370,000.00                  |
| Kennedy et al. [5]     | CNT                   | LC50            | <i>Hyalella azteca</i> , amphipod         | 264,000,000.00        | 240               | 10      | 10           | 2,640,000.00                |
| Kennedy et al. [182]   | CNT                   | HONEC           | <i>Hyalella azteca</i> , amphipod         | 99,000,000.00         | 240               | 10      | 1            | 9,900,000.00                |
| Pakarinen [183]        | Fullerenes            | HONEC           | <i>Lumbriculus variegatus</i>             | 50,000.00             | 672               | 1       | 1            | 50,000.00                   |
| Musee, et. Al. [184]   | Nano-TiO <sub>2</sub> | HONEC           | <i>Physa acuta</i> , snail                | 500,000.00            | 672               | 1       | 1            | 500,000.00                  |

## References

1. Mouchet, F., et al., *Assessment of the potential in vivo ecotoxicity of double-walled carbon nanotubes (DWNTs) in water, using the amphibian *Amystoma mexicanum**. *Nanotoxicology*, 2007. **1**(2): p. 149-156.
2. Templeton, R.C., et al., *Life-cycle effects of single-walled carbon nanotubes (SWNTs) on an estuarine meiobenthic copepod*. *Environ. Sci. Technol.*, 2006. **40**: p. 7387-7393.
3. Li, M. and C.P. Huang, *The responses of *Ceriodaphnia dubia* toward multi-walled carbon nanotubes: Effect of physical-chemical treatment*. *Carbon*, 2011. **49**(5): p. 1672-1679.
4. Alloy, M.M. and A.P. Roberts, *Effects of suspended multi-walled carbon nanotubes on daphnid growth and reproduction*. *Ecotoxicol Environ Saf*, 2011. **74**(7): p. 1839-43.
5. Kennedy, A.J., et al., *Factors influencing the partitioning and toxicity of nanotubes in the aquatic environment*. *Environmental Toxicology and Chemistry*, 2008. **27**(9): p. 1932-1941.
6. Long, Z.F., et al., *Systematic and Quantitative Investigation of the Mechanism of Carbon Nanotubes' Toxicity toward Algae*. *Environmental Science & Technology*, 2012. **46**(15): p. 8458-8466.
7. Schwab, F., et al., *Are carbon nanotube effects on green algae caused by shading and agglomeration?*. *Environ. Sci. Technol.*, 2011. **45**: p. 6136-6144.
8. Asharani, P.V., et al., *Impact of Multi-Walled Carbon Nanotubes on Aquatic Species*. *Journal of Nanoscience and Nanotechnology*, 2008. **8**(7): p. 3603-3609.
9. Cheng, J., E. Flahaut, and S.H. Cheng, *Effect of carbon nanotubes on developing zebrafish (*Danio rerio*) embryos*. *Environ Toxicol Chem*, 2007. **26**(4): p. 708-16.
10. Zhu, X.S., et al., *Acute toxicities of six manufactured nanomaterial suspensions to *Daphnia magna**. *Journal of Nanoparticle Research*, 2009. **11**(1): p. 67-75.
11. Edgington, A.J., et al., *The influence of natural organic matter on the toxicity of multiwalled carbon nanotubes*. *Environ Toxicol Chem*, 2010. **29**(11): p. 2511-8.
12. Roberts, A.P., et al., *In vivo biomodification of lipid-coated carbon nanotubes by *Daphnia magna**. *Environ. Sci. Technol.*, 2007. **41**: p. 3025-3029.
13. Bayat, N., et al., *The effects of engineered nanoparticles on the cellular structure and growth of *Saccharomyces cerevisiae**. *Nanotoxicology*, 2014. **8**(4): p. 363-73.
14. Zhu, Y., et al., *The Interaction and Toxicity of Multi-Walled Carbon Nanotubes with *Stylynychia Mytilus**. *Journal of Nanoscience and Nanotechnology*, 2006. **6**(5): p. 1357-1364.
15. Ghafari, P., et al., *Impact of carbon nanotubes on the ingestion and digestion of bacteria by ciliated protozoa*. *Nat Nanotechnol*, 2008. **3**(6): p. 347-51.
16. Mouchet, F., et al., *Characterisation and in vivo ecotoxicity evaluation of double-wall carbon nanotubes in larvae of the amphibian *Xenopus laevis**. *Aquat Toxicol*, 2008. **87**(2): p. 127-37.
17. Mouchet, F., et al., *Carbon nanotube ecotoxicity in amphibians: assessment of multiwalled carbon nanotubes and comparison with double-walled carbon nanotubes*. *Nanomedicine (Lond)*, 2010. **5**(6): p. 963-74.
18. Fang, J., et al., *Effect of a fullerene water suspension on bacterial phospholipids and membrane phase behavior*. *Environ. Sci. Technol.*, 2007. **41**: p. 2636-2642.
19. Zhu, X.S., et al., *Oxidative stress and growth inhibition in the freshwater fish *Carassius auratus* induced by chronic exposure to sublethal fullerene aggregates*. *Environmental Toxicology and Chemistry*, 2008. **27**(9): p. 1979-1985.
20. Luo, J., *Toxicity and Bioaccumulation of Nanomaterial in Aquatic Species*. *Journal of the U.S. SJWP*, 2007. **2**.
21. Isaacson, C.W., et al., *Quantification of fullerenes by LC/ESI-MS and its application to in vivo toxicity assays*. *Analytical Chemistry*, 2007. **79**(23): p. 9091-9097.
22. Usenko, C.Y., S.L. Harper, and R.L. Tanguay, *Fullerene C60 exposure elicits an oxidative stress response in embryonic zebrafish*. *Toxicol Appl Pharmacol*, 2008. **229**(1): p. 44-55.
23. Seda, B.C., et al., *Toxicity of aqueous C70-gallic acid suspension in *Daphnia magna**. *Environ Toxicol Chem*, 2012. **31**(1): p. 215-20.
24. Tao, X., et al., *Effects of aqueous stable fullerene nanocrystals (nC60) on *Daphnia magna*: evaluation of sub-lethal reproductive responses and accumulation*. *Chemosphere*, 2009. **77**(11): p. 1482-7.
25. Lovern, S.B. and R. Klaper, **Daphnia magna* mortality when exposed to titanium dioxide and fullerene (C60) nanoparticles*. *Environ. Toxicol. Chem.*, 2006. **25**(4): p. 1132-1137.
26. Zhu, S., E. Oberdorster, and M.L. Haasch, *Toxicity of an engineered nanoparticle (fullerene, C60) in two aquatic species, *Daphnia* and fathead minnow*. *Mar Environ Res*, 2006. **62 Suppl**: p. S5-9.

27. Zhu, X., et al., *Acute toxicities of six manufactured nanomaterial suspensions to Daphnia magna*. Journal of Nanoparticle Research, 2008. **11**(1): p. 67-75.
28. Oberdörster, E., et al., *Ecotoxicology of carbon-based engineered nanoparticles: Effects of fullerene (C<sub>60</sub>) on aquatic organisms*. Carbon, 2006. **44**: p. 1112-1120.
29. Ivask, A., et al., *Profiling of the reactive oxygen species-related ecotoxicity of CuO, ZnO, TiO<sub>2</sub>, silver and fullerene nanoparticles using a set of recombinant luminescent Escherichia coli strains: differentiating the impact of particles and solubilised metals*. Anal Bioanal Chem, 2010. **398**(2): p. 701-16.
30. Oberdörster, E., *Manufactured nanomaterials (Fullerenes, C<sub>60</sub>) induce oxidative stress in the brain of juvenile largemouth bass*. Environ. Health Perspect., 2004. **112**(10): p. 1058-1062.
31. Gao, J., et al., *Effects of engineered nanomaterials on microbial catalyzed biogeochemical processes in sediments*. J Hazard Mater, 2011. **186**(1): p. 940-5.
32. Luo, Z., et al., *Gold and silver nanoparticle effects on ammonia-oxidizing bacteria cultures under ammonoxidation*. Chemosphere, 2014.
33. Jin, X., et al., *High-Throughput Screening of Silver Nanoparticle Stability and Bacterial Inactivation in Aquatic Media: Influence of Specific Ions*. Environmental Science & Technology, 2010. **44**(19): p. 7321-7328.
34. Yoon, K.Y., et al., *Susceptibility constants of Escherichia coli and Bacillus subtilis to silver and copper nanoparticles*. Sci Total Environ, 2007. **373**(2-3): p. 572-5.
35. Roh, J.Y., et al., *Ecotoxicity of Silver Nanoparticles on the Soil Nematode Caenorhabditis elegans Using Functional Ecotoxicogenomics*. Environmental Science & Technology, 2009. **43**(10): p. 3933-3940.
36. Kim, S.W., S.H. Nam, and Y.J. An, *Interaction of silver nanoparticles with biological surfaces of Caenorhabditis elegans*. Ecotoxicol Environ Saf, 2012. **77**: p. 64-70.
37. Meyer, J.N., et al., *Intracellular uptake and associated toxicity of silver nanoparticles in Caenorhabditis elegans*. Aquatic Toxicology, 2010. **100**(2): p. 140-150.
38. Angel, B.M., et al., *The impact of size on the fate and toxicity of nanoparticulate silver in aquatic systems*. Chemosphere, 2013. **93**(2): p. 359-65.
39. Gao, J., et al., *Dispersion and toxicity of selected manufactured nanomaterials in natural river water samples: Effects of water chemical composition*. Environ. Sci. Technol., 2009. **43**: p. 3322-3328.
40. Kennedy, A.J., et al., *Impact of Organic Carbon on the Stability and Toxicity of Fresh and Stored Silver Nanoparticles*. Environmental Science & Technology, 2012. **46**(19): p. 10772-10780.
41. Griffith, R.J., et al., *Effects of particle composition and species on toxicity of metallic nanomaterials in aquatic organisms*. Environmental Toxicology and Chemistry, 2008. **27**(9): p. 1972-1978.
42. McLaughlin, J. and J.C.J. Bonzongo, *Effects of natural water chemistry on nanosilver behavior and toxicity to Ceriodaphnia dubia and Pseudokirchneriella subcapitata*. Environmental Toxicology and Chemistry, 2012. **31**(1): p. 168-175.
43. Nair, P.M., S.Y. Park, and J. Choi, *Evaluation of the effect of silver nanoparticles and silver ions using stress responsive gene expression in Chironomus riparius*. Chemosphere, 2013. **92**(5): p. 592-9.
44. Navarro, E., et al., *Toxicity of Silver Nanoparticles to Chlamydomonas reinhardtii*. Environ. Sci. Technol., 2008. **42**(23): p. 8959-8964.
45. Wang, Z., et al., *Aquatic toxicity of nanosilver colloids to different trophic organisms: contributions of particles and free silver ion*. Environ Toxicol Chem, 2012. **31**(10): p. 2408-13.
46. Massarsky, A., et al., *Assessment of nanosilver toxicity during zebrafish (Danio rerio) development*. Chemosphere, 2013. **92**(1): p. 59-66.
47. Kaewamatawong, T., Ponpornpisit, A., et al., *Toxicity Test of Nanosilver Particles on Zebrafish (Danio rerio) Embryonic Development*. Thai J Vet Med., 2012. **42**(3): p. 305-310.
48. Cunningham, S., et al., *Effect of nanoparticle stabilization and physicochemical properties on exposure outcome: acute toxicity of silver nanoparticle preparations in zebrafish (Danio rerio)*. Environ Sci Technol, 2013. **47**(8): p. 3883-92.
49. Bilberg, K., et al., *In Vivo Toxicity of Silver Nanoparticles and Silver Ions in Zebrafish (Danio rerio)*. J Toxicol, 2012. **2012**: p. 293784.
50. Muth-Kohne, E., et al., *The toxicity of silver nanoparticles to zebrafish embryos increases through sewage treatment processes*. Ecotoxicology, 2013. **22**(8): p. 1264-77.
51. van Aerle, R., et al., *Molecular mechanisms of toxicity of silver nanoparticles in zebrafish embryos*. Environ Sci Technol, 2013. **47**(14): p. 8005-14.
52. Asharani, P.V., et al., *Toxicity of silver nanoparticles in zebrafish models*. Nanotechnology, 2008. **19**(25): p. 255102.
53. Choi, J.E., et al., *Induction of oxidative stress and apoptosis by silver nanoparticles in the liver of adult zebrafish*. Aquat Toxicol, 2010. **100**(2): p. 151-9.

54. Volker, C., et al., *Comparative toxicity assessment of nanosilver on three Daphnia species in acute, chronic and multi-generation experiments*. PLoS One, 2013. **8**(10): p. e75026.
55. Lee, Y.J., et al., *Ion-release kinetics and ecotoxicity effects of silver nanoparticles*. Environmental Toxicology and Chemistry, 2012. **31**(1): p. 155-159.
56. Kim, J., S. Kim, and S. Lee, *Differentiation of the toxicities of silver nanoparticles and silver ions to the Japanese medaka (Oryzias latipes) and the cladoceran Daphnia magna*. Nanotoxicology, 2011. **5**(2): p. 208-214.
57. Zhao, C.M. and W.X. Wang, *Importance of surface coatings and soluble silver in silver nanoparticles toxicity to Daphnia magna*. Nanotoxicology, 2012. **6**(4): p. 361-70.
58. Allen, H.J., et al., *Effects from filtration, capping agents, and presence/absence of food on the toxicity of silver nanoparticles to Daphnia magna*. Environ Toxicol Chem, 2010. **29**(12): p. 2742-50.
59. Georgantzopoulou, A., et al., *Ag nanoparticles: size- and surface-dependent effects on model aquatic organisms and uptake evaluation with NanoSIMS*. Nanotoxicology, 2013. **7**: p. 1168-78.
60. Poynton, H.C., et al., *Toxicogenomic Responses of Nanotoxicity in Daphnia magna Exposed to Silver Nitrate and Coated Silver Nanoparticles*. Environmental Science & Technology, 2012. **46**(11): p. 6288-6296.
61. Kennedy, A.J., et al., *Fractionating Nanosilver: Importance for Determining Toxicity to Aquatic Test Organisms*. Environmental Science & Technology, 2010. **44**(24): p. 9571-9577.
62. Asghari, S., et al., *Toxicity of various silver nanoparticles compared to silver ions in Daphnia magna*. J Nanobiotechnology, 2012. **10**: p. 14.
63. Newton, K.M., et al., *Silver nanoparticle toxicity to Daphnia magna is a function of dissolved silver concentration*. Environmental Toxicology and Chemistry, 2013. **32**(10): p. 2356-2364.
64. Das, P., M.A. Xenopoulos, and C.D. Metcalfe, *Toxicity of silver and titanium dioxide nanoparticle suspensions to the aquatic invertebrate, Daphnia magna*. Bull Environ Contam Toxicol, 2013. **91**(1): p. 76-82.
65. Li, T., et al., *Comparative toxicity study of Ag, Au, and Ag-Au bimetallic nanoparticles on Daphnia magna*. Analytical and Bioanalytical Chemistry, 2010. **398**(2): p. 689-700.
66. Jo, H.J., et al., *Acute toxicity of Ag and CuO nanoparticle suspensions against Daphnia magna: the importance of their dissolved fraction varying with preparation methods*. J Hazard Mater, 2012. **227-228**: p. 301-8.
67. Hoheisel, S.M., S. Diamond, and D. Mount, *Comparison of nanosilver and ionic silver toxicity in Daphnia magna and Pimephales promelas*. Environmental Toxicology and Chemistry, 2012. **31**(11): p. 2557-2563.
68. Stensberg, M.C., et al., *Silver nanoparticle-specific mitotoxicity in Daphnia magna*. Nanotoxicology, 2014. **8**: p. 833-42.
69. Zhao, C.M. and W.X. Wang, *Comparison of acute and chronic toxicity of silver nanoparticles and silver nitrate to Daphnia magna*. Environ Toxicol Chem, 2011. **30**(4): p. 885-92.
70. Pokhrel, L.R., B. Dubey, and P.R. Scheuerman, *Impacts of select organic ligands on the colloidal stability, dissolution dynamics, and toxicity of silver nanoparticles*. Environ Sci Technol, 2013. **47**(22): p. 12877-85.
71. Blinova, I., et al., *Toxicity of two types of silver nanoparticles to aquatic crustaceans Daphnia magna and Thamnocephalus platyurus*. Environ Sci Pollut Res Int, 2013. **20**(5): p. 3456-63.
72. Martínez-Castañón, G.A., et al., *Synthesis and antibacterial activity of silver nanoparticles with different sizes*. Journal of Nanoparticle Research, 2008. **10**(8): p. 1343-1348.
73. Pokhrel, L.R., et al., *Rapid screening of aquatic toxicity of several metal-based nanoparticles using the MetPLATE bioassay*. Sci Total Environ, 2012. **426**: p. 414-22.
74. Arce Funck, J., et al., *Behavioural and physiological responses of Gammarus fossarum (Crustacea Amphipoda) exposed to silver*. Aquat Toxicol, 2013. **142-143**: p. 73-84.
75. Gubbins, E.J., L.C. Batty, and J.R. Lead, *Phytotoxicity of silver nanoparticles to Lemna minor L.* Environ Pollut, 2011. **159**(6): p. 1551-9.
76. Kim, E., et al., *Growth inhibition of aquatic plant caused by silver and titanium oxide nanoparticles*. Toxicology and Environmental Health Sciences, 2011. **3**(1): p. 1-6.
77. Ali, D., et al., *Sensitivity of freshwater pulmonate snail Lymnaea luteola L., to silver nanoparticles*. Chemosphere, 2014. **104**: p. 134-40.
78. Miao, A.J., et al., *Intracellular Uptake: A Possible Mechanism for Silver Engineered Nanoparticle Toxicity to a Freshwater Alga Ochromonas danica*. Plos One, 2010. **5**(12).
79. Govindasamy, R. and A.A. Rahuman, *Histopathological studies and oxidative stress of synthesized silver nanoparticles in Mozambique tilapia (Oreochromis mossambicus)*. Journal of Environmental Sciences, 2012. **24**(6): p. 1091-1098.
80. Chae, Y.J., et al., *Evaluation of the toxic impact of silver nanoparticles on Japanese medaka (Oryzias latipes)*. Aquat Toxicol, 2009. **94**(4): p. 320-7.
81. Wu, Y., et al., *Effects of silver nanoparticles on the development and histopathology biomarkers of Japanese medaka (Oryzias latipes) using the partial-life test*. Aquat Toxicol, 2010. **100**(2): p. 160-7.



82. Kashiwada, S., et al., *Silver nanocolloids disrupt medaka embryogenesis through vital gene expressions*. Environ Sci Technol, 2012. **46**(11): p. 6278-87.
83. Kim, J.Y., et al., *Developmental toxicity of Japanese medaka embryos by silver nanoparticles and released ions in the presence of humic acid*. Ecotoxicol Environ Saf, 2013. **92**: p. 57-63.
84. Kvittek, L., et al., *Initial Study on the Toxicity of Silver Nanoparticles (NPs) against Paramecium caudatum*. Journal of Physical Chemistry C, 2009. **113**(11): p. 4296-4300.
85. Bilberg, K., et al., *Silver nanoparticles and silver nitrate cause respiratory stress in Eurasian perch (Perca fluviatilis)*. Aquat Toxicol, 2010. **96**(2): p. 159-65.
86. Laban, G., et al., *The effects of silver nanoparticles on fathead minnow (Pimephales promelas) embryos*. Ecotoxicology, 2010. **19**(1): p. 185-195.
87. Debabrata D., G.A., *Cellular responses of Saccharomyces cerevisiae to silver nanoparticles*. Res J Biotech, 2013. **8**(1): p. 11.
88. Niazi, J.H., et al., *Global gene response in Saccharomyces cerevisiae exposed to silver nanoparticles*. Appl Biochem Biotechnol, 2011. **164**(8): p. 1278-91.
89. Jiang, H.S., et al., *Physiological analysis of silver nanoparticles and AgNO<sub>3</sub> toxicity to Spirodela polyrhiza*. Environ Toxicol Chem, 2012. **31**(8): p. 1880-6.
90. Burchardt, A.D., et al., *Effects of silver nanoparticles in diatom Thalassiosira pseudonana and cyanobacterium Synechococcus sp.* Environ Sci Technol, 2012. **46**(20): p. 11336-44.
91. Juganson, K., et al., *Extracellular conversion of silver ions into silver nanoparticles by protozoan Tetrahymena thermophila*. Environmental Science: Processes & Impacts, 2013. **15**(1): p. 244-250.
92. Cherchi, C., et al., *Impact of nano titanium dioxide exposure on cellular structure of Anabaena variabilis and evidence of internalization*. Environ Toxicol Chem, 2011. **30**(4): p. 861-9.
93. Adams, L.K., D.Y. Lyon, and P.J. Alvarez, *Comparative eco-toxicity of nanoscale TiO<sub>2</sub>, SiO<sub>2</sub>, and ZnO water suspensions*. Water Res, 2006. **40**(19): p. 3527-32.
94. Clement, L., C. Hurel, and N. Marmier, *Toxicity of TiO<sub>2</sub> nanoparticles to cladocerans, algae, rotifers and plants - effects of size and crystalline structure*. Chemosphere, 2013. **90**(3): p. 1083-90.
95. Wu, Q., et al., *Comparison of toxicities from three metal oxide nanoparticles at environmental relevant concentrations in nematode Caenorhabditis elegans*. Chemosphere, 2013. **90**(3): p. 1123-31.
96. Wang, H., R.L. Wick, and B. Xing, *Toxicity of nanoparticulate and bulk ZnO, Al<sub>2</sub>O<sub>3</sub> and TiO<sub>2</sub> to the nematode Caenorhabditis elegans*. Environ Pollut, 2009. **157**(4): p. 1171-7.
97. Hall, S., et al., *Acute and chronic toxicity of nano-scale TiO<sub>2</sub> particles to freshwater fish, cladocerans, and green algae, and effects of organic and inorganic substrate on TiO<sub>2</sub> toxicity*. Nanotoxicology, 2009. **3**(2): p. 91-97.
98. Wang, D., et al., *Synergistic toxic effect of nano-TiO and As(V) on Ceriodaphnia dubia*. Sci Total Environ, 2011. **409**(7): p. 1351-6.
99. Li, S., et al., *Species sensitivity and dependence on exposure conditions impacting the phototoxicity of TiO<sub>2</sub> nanoparticles to benthic organisms*. Environ Toxicol Chem, 2014. **33**(7): p. 1563-9.
100. Wang, J., et al., *Toxicity assessment of manufactured nanomaterials using the unicellular green alga Chlamydomonas reinhardtii*. Chemosphere, 2008. **73**(7): p. 1121-8.
101. Gunawan, C., et al., *Submicron and nano formulations of titanium dioxide and zinc oxide stimulate unique cellular toxicological responses in the green microalga Chlamydomonas reinhardtii*. J Hazard Mater, 2013. **260**: p. 984-92.
102. Sadiq, I.M., et al., *Ecotoxicity study of titania (TiO<sub>2</sub>) NPs on two microalgae species: Scenedesmus sp. and Chlorella sp.* Ecotoxicol Environ Saf, 2011. **74**(5): p. 1180-7.
103. Ji, J., Z.F. Long, and D.H. Lin, *Toxicity of oxide nanoparticles to the green algae Chlorella sp.* Chemical Engineering Journal, 2011. **170**(2-3): p. 525-530.
104. Chen, J., et al., *Effects of titanium dioxide nano-particles on growth and some histological parameters of zebrafish (Danio rerio) after a long-term exposure*. Aquat Toxicol, 2011. **101**(3-4): p. 493-9.
105. Xiong, D., et al., *Effects of nano-scale TiO<sub>2</sub>, ZnO and their bulk counterparts on zebrafish: acute toxicity, oxidative stress and oxidative damage*. Sci Total Environ, 2011. **409**(8): p. 1444-52.
106. Yang, S.P., et al., *Influence of humic acid on titanium dioxide nanoparticle toxicity to developing zebrafish*. Environ Sci Technol, 2013. **47**(9): p. 4718-25.
107. Bar-Ilan, O., et al., *Titanium dioxide nanoparticles produce phototoxicity in the developing zebrafish*. Nanotoxicology, 2012. **6**(6): p. 670-9.
108. Zhu, X., et al., *Comparative toxicity of several metal oxide nanoparticle aqueous suspensions to Zebrafish (Danio rerio) early developmental stage*. J Environ Sci Health A Tox Hazard Subst Environ Eng, 2008. **43**(3): p. 278-84.
109. Ma, H., A. Brennan, and S.A. Diamond, *Phototoxicity of TiO<sub>2</sub> nanoparticles under solar radiation to two aquatic species: Daphnia magna and Japanese medaka*. Environmental Toxicology Chemistry, 2012. **31**(7): p. 1621-1629.

110. Dabrunz, A., et al., *Biological Surface Coating and Molting Inhibition as Mechanisms of TiO<sub>2</sub> Nanoparticle Toxicity in Daphnia magna*. Plos One, 2011. **6**(5).
111. Zhu, X., Y. Chang, and Y. Chen, *Toxicity and bioaccumulation of TiO<sub>2</sub> nanoparticle aggregates in Daphnia magna*. Chemosphere, 2010. **78**(3): p. 209-15.
112. Warheit, D.B., et al., *Development of a base set of toxicity tests using ultrafine TiO<sub>2</sub> particles as a component of nanoparticle risk management*. Toxicol Lett, 2007. **171**(3): p. 99-110.
113. Kim, K.T., et al., *Oxidative stress responses of Daphnia magna exposed to TiO<sub>2</sub> nanoparticles according to size fraction*. Science of the Total Environment, 2010. **408**(10): p. 2268-2272.
114. Jacobasch, C., et al., *Long-term effects of nanoscaled titanium dioxide on the cladoceran Daphnia magna over six generations*. Environ Pollut, 2013. **186C**: p. 180-186.
115. Amiano, I., et al., *Acute toxicity of nanosized TiO<sub>2</sub> to Daphnia magna under UVA irradiation*. Environ Toxicol Chem, 2012. **31**(11): p. 2564-6.
116. Wiench, K., et al., *Acute and chronic effects of nano- and non-nano-scale TiO<sub>2</sub> and ZnO particles on mobility and reproduction of the freshwater invertebrate Daphnia magna*. Chemosphere, 2009. **76**(10): p. 1356-65.
117. Heinlaan, M., et al., *Toxicity of nanosized and bulk ZnO, CuO and TiO<sub>2</sub> to bacteria Vibrio fischeri and crustaceans Daphnia magna and Thamnocephalus platyurus*. Chemosphere, 2008. **71**(7): p. 1308-1316.
118. Marcone, G.P.S., et al., *Ecotoxicity of TiO<sub>2</sub> to Daphnia similis under irradiation*. Journal of Hazardous Materials, 2012. **211**: p. 436-442.
119. Hund-Rinke, K. and M. Simon, *Ecotoxic effect of photocatalytic active nanoparticles TiO<sub>2</sub> on algae and daphnids*. Environ. Sci. Pollution Res., 2006. **13**(4): p. 225-232.
120. Bigorgne, E., et al., *Ecotoxicological assessment of TiO<sub>2</sub> byproducts on the earthworm Eisenia fetida*. Environ Pollut, 2011. **159**(10): p. 2698-705.
121. Dasari, T.P., K. Pathakoti, and H.-M. Hwang, *Determination of the mechanism of photoinduced toxicity of selected metal oxide nanoparticles (ZnO, CuO, Co<sub>3</sub>O<sub>4</sub> and TiO<sub>2</sub>) to E. coli bacteria*. Journal of Environmental Sciences, 2013. **25**(5): p. 882-888.
122. Hu, X., et al., *In vitro evaluation of cytotoxicity of engineered metal oxide nanoparticles*. Sci Total Environ, 2009. **407**(8): p. 3070-2.
123. Bundschuh, M., et al., *Effects of nano-TiO<sub>2</sub> in combination with ambient UV-irradiation on a leaf shredding amphipod*. Chemosphere, 2011. **85**(10): p. 1563-7.
124. Zhu, X., J. Zhou, and Z. Cai, *TiO<sub>2</sub> nanoparticles in the marine environment: impact on the toxicity of tributyltin to abalone (Haliotis diversicolor supertexta) embryos*. Environ Sci Technol, 2011. **45**(8): p. 3753-8.
125. Li, S., et al., *Phototoxicity of TiO<sub>2</sub> nanoparticles to a freshwater benthic amphipod: are benthic systems at risk?* Sci Total Environ, 2014. **466-467**: p. 800-8.
126. Federici, G., B.J. Shaw, and R.D. Handy, *Toxicity of titanium dioxide nanoparticles to rainbow trout (Oncorhynchus mykiss): gill injury, oxidative stress, and other physiological effects*. Aquat Toxicol, 2007. **84**(4): p. 415-30.
127. Li, K., et al., *Surface interactions affect the toxicity of engineered metal oxide nanoparticles toward Paramecium*. Chem Res Toxicol, 2012. **25**(8): p. 1675-81.
128. Jovanovic, B., et al., *Effects of nanosized titanium dioxide on innate immune system of fathead minnow (Pimephales promelas Rafinesque, 1820)*. Ecotoxicology and Environmental Safety, 2011. **74**(4): p. 675-683.
129. Kim, S., J. Kim, and I. Lee, *Effects of Zn and ZnO nanoparticles and Zn<sup>2+</sup> on soil enzyme activity and bioaccumulation of Zn in Cucumis sativus*. Chemistry and Ecology, 2011. **27**(1): p. 49-55.
130. Aruoja, V., et al., *Toxicity of nanoparticles of CuO, ZnO and TiO<sub>2</sub> to microalgae Pseudokirchneriella subcapitata*. Sci Total Environ, 2009. **407**(4): p. 1461-8.
131. Hartmann, N.B., et al., *Algal testing of titanium dioxide nanoparticles-Testing considerations, inhibitory effects and modification of cadmium bioavailability*. Toxicology, 2010. **269**(2-3): p. 190-197.
132. Metzler, D.M., et al., *Responses of algae to photocatalytic nano-TiO<sub>2</sub> particles with an emphasis on the effect of particle size*. Chemical Engineering Journal, 2011. **170**(2-3): p. 538-546.
133. Kasemets, K., et al., *Toxicity of nanoparticles of ZnO, CuO and TiO<sub>2</sub> to yeast Saccharomyces cerevisiae*. Toxicol In Vitro, 2009. **23**(6): p. 1116-22.
134. Velzeboer, I., et al., *Aquatic ecotoxicity tests of some nanomaterials*. Environmental Toxicology and Chemistry, 2008. **27**(9): p. 1942-1947.
135. Nations, S., et al., *Acute effects of Fe<sub>2</sub>O<sub>3</sub>, TiO<sub>2</sub>, ZnO and CuO nanomaterials on Xenopus laevis*. Chemosphere, 2011. **83**(8): p. 1053-61.
136. Li, M., et al., *Stability, Bioavailability, and Bacterial Toxicity of ZnO and Iron-Doped ZnO Nanoparticles in Aquatic Media*. Environmental Science & Technology, 2010. **45**(2): p. 755-761.

137. Jones, N., et al., *Antibacterial activity of ZnO nanoparticle suspensions on a broad spectrum of microorganisms*. FEMS Microbiol Lett, 2008. **279**(1): p. 71-6.
138. Ma, H., Besrtsch, P., Glenn, T. T., Kabengl, N., Williams, P., *Toxicity of manufactured zinc oxide nanoparticles in the nematode Caenorhabditis elegans*. Environmental Toxicology and Chemistry, 2009. **28**(6): p. 1324–1330.
139. Ma, H., et al., *Comparative phototoxicity of nanoparticulate and bulk ZnO to a free-living nematode Caenorhabditis elegans: The importance of illumination mode and primary particle size*. Environmental Pollution, 2011. **159**(6): p. 1473-1480.
140. Lin, D.H., et al., *The influence of dissolved and surface-bound humic acid on the toxicity of TiO<sub>2</sub> nanoparticles to Chlorella sp.* Water Research, 2012. **46**(14): p. 4477-4487.
141. Fabrega, J., et al., *Sequestration of zinc from zinc oxide nanoparticles and life cycle effects in the sediment dweller amphipod Corophium volutator*. Environ Sci Technol, 2012. **46**(2): p. 1128-35.
142. Yu, L.P., et al., *Comparative toxicity of nano-ZnO and bulk ZnO suspensions to zebrafish and the effects of sedimentation, OH production and particle dissolution in distilled water*. J Environ Monit, 2011. **13**(7): p. 1975-82.
143. Zhao, H., Lu, G., Jin, S., *Toxicity of Nanoscale CuO and ZnO to Daphnia magna*. CHEM. RES. CHINESE UNIVERSITIES 2012. **28**(2): p. 209—213.
144. Lopes, S., et al., *Zinc oxide nanoparticles toxicity to Daphnia magna: size-dependent effects and dissolution*. Environ Toxicol Chem, 2014. **33**(1): p. 190-8.
145. Blinova, I., et al., *Ecotoxicity of nanoparticles of CuO and ZnO in natural water*. Environ Pollut, 2010. **158**(1): p. 41-7.
146. Naddafi, K., M.R. Zare, and S. Nazmara, *Investigating potential toxicity of phenanthrene adsorbed to nano-ZnO using Daphnia magna*. Toxicological & Environmental Chemistry, 2011. **93**(4): p. 729-737.
147. Poynton, H.C., et al., *Differential Gene Expression in Daphnia magna Suggests Distinct Modes of Action and Bioavailability for ZnO Nanoparticles and Zn Ions*. Environmental Science & Technology, 2011. **45**(2): p. 762-768.
148. Zarrindokht, E.-K., *Antibacterial activity of ZnO nanoparticle on Gram-positive and Gram-negative bacteria*. African Journal of Microbiology Research, 2012. **5**(18).
149. Poynton, H.C., et al., *Toxicity and transcriptomic analysis in Hyalella azteca suggests increased exposure and susceptibility of epibenthic organisms to zinc oxide nanoparticles*. Environ Sci Technol, 2013. **47**(16): p. 9453-60.
150. Miller, R.J., et al., *Impacts of Metal Oxide Nanoparticles on Marine Phytoplankton*. Environmental Science & Technology, 2010. **44**(19): p. 7329-7334.
151. Lin, D. and B. Xing, *Phytotoxicity of nanoparticles: Inhibition of seed germination and root growth*. Environ. Pollut., 2007. **150**: p. 243-250.
152. Lin, D. and B. Xing, *Root uptake and phytotoxicity of ZnO nanoparticles*. Environ. Sci. Technol., 2008. **42**(15): p. 5580-5585.
153. Franklin, N.M., et al., *Comparative toxicity of nanoparticulate ZnO, bulk ZnO, and ZnCl<sub>2</sub> to a freshwater microalga (Pseudokirchneriella subcapitata): The importance of particle solubility*. Environmental Science & Technology, 2007. **41**(24): p. 8484-8490.
154. Lee, W.M. and Y.J. An, *Effects of zinc oxide and titanium dioxide nanoparticles on green algae under visible, UVA, and UVB irradiations: no evidence of enhanced algal toxicity under UV pre-irradiation*. Chemosphere, 2013. **91**(4): p. 536-44.
155. Mortimer, M., K. Kasemets, and A. Kahru, *Toxicity of ZnO and CuO nanoparticles to ciliated protozoa Tetrahymena thermophila*. Toxicology, 2010. **269**(2-3): p. 182-9.
156. Wong, S.W., et al., *Toxicities of nano zinc oxide to five marine organisms: influences of aggregate size and ion solubility*. Anal Bioanal Chem, 2010. **396**(2): p. 609-18.
157. Jarvis, T.A., et al., *Toxicity of ZnO nanoparticles to the copepod Acartia tonsa, exposed through a phytoplankton diet*. Environmental Toxicology and Chemistry, 2013. **32**(6): p. 1264-1269.
158. De La Torre-Roche, R., et al., *Multiwalled carbon nanotubes and c60 fullerenes differentially impact the accumulation of weathered pesticides in four agricultural plants*. Environ Sci Technol, 2013. **47**(21): p. 12539-47.
159. Scott-Fordsmand, J.J., et al., *The toxicity testing of double-walled nanotubes-contaminated food to Eisenia veneta earthworms*. Ecotoxicol Environ Saf, 2008. **71**(3): p. 616-9.
160. Chung, H., et al., *The effect of multi-walled carbon nanotubes on soil microbial activity*. Ecotoxicol Environ Saf, 2011. **74**(4): p. 569-75.
161. Shrestha, B., et al., *An evaluation of the impact of multiwalled carbon nanotubes on soil microbial community structure and functioning*. J Hazard Mater, 2013. **261**: p. 188-97.
162. Johansen, A., et al., *Effects of C-60 fullerene nanoparticles on soil bacteria and protozoans*. Environmental Toxicology and Chemistry, 2008. **27**(9): p. 1895-1903.
163. van der Ploeg, M.J., et al., *Effects of C60 nanoparticle exposure on earthworms (Lumbricus rubellus) and implications for population dynamics*. Environ Pollut, 2011. **159**(1): p. 198-203.
164. Tong, Z., et al., *Impact of fullerene (C<sub>60</sub>) on a soil microbial community*. Environ. Sci. Technol., 2007. **41**: p. 2985-2991.

165. Schlich, K., et al., *Effects of silver nanoparticles and silver nitrate in the earthworm reproduction test*. Environ Toxicol Chem, 2013. **32**(1): p. 181-8.
166. Shoultz-Wilson, W.A., et al., *Role of Particle Size and Soil Type in Toxicity of Silver Nanoparticles to Earthworms*. Soil Science Society of America Journal, 2011. **75**(2): p. 365.
167. Gomes, S.I., et al., *Mechanisms of response to silver nanoparticles on Enchytraeus albidus (Oligochaeta): survival, reproduction and gene expression profile*. J Hazard Mater, 2013. **254-255**: p. 336-44.
168. Lee, W.M., J.I. Kwak, and Y.J. An, *Effect of silver nanoparticles in crop plants Phaseolus radiatus and Sorghum bicolor: Media effect on phytotoxicity*. Chemosphere, 2012. **86**(5): p. 491-499.
169. Heckmann, L.H., et al., *Limit-test toxicity screening of selected inorganic nanoparticles to the earthworm Eisenia fetida*. Ecotoxicology, 2011. **20**(1): p. 226-233.
170. Hu, C.W., et al., *Toxicological effects of TiO<sub>2</sub> and ZnO nanoparticles in soil on earthworm Eisenia fetida*. Soil Biology & Biochemistry, 2010. **42**(4): p. 586-591.
171. Canas, J.E., et al., *Acute and reproductive toxicity of nano-sized metal oxides (ZnO and TiO<sub>2</sub>) to earthworms (Eisenia fetida)*. J Environ Monit, 2011. **13**(12): p. 3351-7.
172. Nogueira, V., et al., *Impact of organic and inorganic nanomaterials in the soil microbial community structure*. Science of the Total Environment, 2012. **424**: p. 344-350.
173. Heggelund, L.R., et al., *Soil pH effects on the comparative toxicity of dissolved zinc, non-nano and nano ZnO to the earthworm Eisenia fetida*. Nanotoxicology, 2014. **8**(5): p. 559-72.
174. Hooper, H.L., et al., *Comparative chronic toxicity of nanoparticulate and ionic zinc to the earthworm Eisenia veneta in a soil matrix*. Environ Int, 2011. **37**(6): p. 1111-7.
175. Waalewijn-Kool, P.L., et al., *The effect of pH on the toxicity of zinc oxide nanoparticles to Folsomia candida in amended field soil*. Environ Toxicol Chem, 2013. **32**(10): p. 2349-55.
176. Waalewijn-Kool, P.L., et al., *Sorption, dissolution and pH determine the long-term equilibration and toxicity of coated and uncoated ZnO nanoparticles in soil*. Environ Pollut, 2013. **178**: p. 59-64.
177. Kool, P.L., M.D. Ortiz, and C.A.M. van Geste, *Chronic toxicity of ZnO nanoparticles, non-nano ZnO and ZnCl<sub>2</sub> to Folsomia candida (Collembola) in relation to bioavailability in soil*. Environmental Pollution, 2011. **159**(10): p. 2713-2719.
178. Manzo, S., et al., *Investigation of ZnO nanoparticles' ecotoxicological effects towards different soil organisms*. Environmental Science and Pollution Research, 2010.
179. Tourinho, P.S., et al., *Influence of soil pH on the toxicity of zinc oxide nanoparticles to the terrestrial isopod Porcellionides pruinosus*. Environ Toxicol Chem, 2013. **32**(12): p. 2808-15.
180. Rousk, J., et al., *Comparative toxicity of nanoparticulate CuO and ZnO to soil bacterial communities*. PLoS One, 2012. **7**(3): p. e34197.
181. Petersen, E.J., Q. Huang, and W.J. Weber, *Ecological uptake and depuration of carbon nanotubes by Lumbriculus variegatus*. Environ. Health Perspect., 2008. **116**(4): p. 496-500.
182. Kennedy, A.J., et al., *INFLUENCE OF NANOTUBE PREPARATION IN AQUATIC BIOASSAYS*. Environmental Toxicology and Chemistry, 2009. **28**(9): p. 1930-1938.
183. Pakarinen, K., et al., *Adverse effects of fullerenes (nC(60)) spiked to sediments on Lumbriculus variegatus (Oligochaeta)*. Environmental Pollution, 2011. **159**(12): p. 3750-3756.
184. Musee, N., et al., *The effects of engineered nanoparticles on survival, reproduction, and behaviour of freshwater snail, Physa acuta (Draparnaud, 1805)*. Chemosphere, 2010. **81**(10): p. 1196-1203.
